# Supplementary material for: Toxicity of Melaleuca alternifolia essential oil to the mitochondrion and NAD+/NADH dehydrogenase in Tribolium confusum
Source: PeerJ. 2018 Nov 13;6:e5693. doi: 10.7717/peerj.5693 (PMC6238770; doi:10.7717/peerj.5693)
Supplement: Supplemental Information 3 [file peerj-06-5693-s003.xlsx]

## Sheet: Sheet1
S2. Table Differentially expressed genes in respiration- related enzymes
# Classification	GeneID	log2Fold	Pvalue	FDR	Regulation	Nr	Nt	Swissprot	KEGG	COG	Interpro	GO
NADH	CL1177.Contig1_All	3.08377	2.38e-16	4.17e-15	Up	gi|189237193|ref|XP_001808466.1|/4.44503e-72/PREDICTED: NADH dehydrogenase [ubiquinone] 1 alpha subcomplex assembly factor 3 [Tribolium castaneum]	NA	sp|A1L1F1|NDUF3_DANRE/2e-20/NADH dehydrogenase [ubiquinone] 1 alpha subcomplex assembly factor 3 OS=Danio rerio GN=ndufaf3 PE=2 SV=1	tca:100141848/7e-73/NADH dehydrogenase [ubiquinone] 1 alpha subcomplex assembly factor 3; K09008 NADH dehydrogenase [ubiquinone] 1 alpha subcomplex assembly factor 3	NA	PS01360/-/Zinc finger MYND-type signature.	NA
NADPH	CL1695.Contig1_All	1.09366	1.28e-13	1.89e-12	Up	gi|642935257|ref|XP_008197935.1|/0/PREDICTED: NADPH-dependent diflavin oxidoreductase 1 [Tribolium castaneum]	NA	sp|Q6PFP6|NDOR1_DANRE/2e-142/NADPH-dependent diflavin oxidoreductase 1 OS=Danio rerio GN=ndor1 PE=2 SV=1	tca:656967/0.0/NADPH-dependent diflavin oxidoreductase 1; K15014 solute carrier family 29 (equilibrative nucleoside transporter), member 1/2/3	SPAC1296.06/2e-67/---	PF00258/3.4E-21/Flavodoxin	NA
NADP	Unigene9223_All	2.16124	4.71e-32	1.62e-30	Up	gi|642926079|ref|XP_008194755.1|/1.63705e-123/PREDICTED: dehydrogenase/reductase SDR family member 11-like [Tribolium castaneum]	NA	sp|Q3ZBV9|DHR11_BOVIN/1e-60/Dehydrogenase/reductase SDR family member 11 OS=Bos taurus GN=DHRS11 PE=2 SV=1	tca:658671/3e-76/dehydrogenase/reductase SDR family member 11-like; K15890 NADP+-dependent farnesol dehydrogenase [EC:1.1.1.216]	SMa0320/3e-35/---	PR00080/5.0E-9/Short-chain dehydrogenase/reductase (SDR) superfamily signature	biological_process:GO:0055114//oxidation-reduction process;molecular_function:GO:0000166//nucleotide binding;GO:0016491//oxidoreductase activity;
	CL35.Contig3_All	2.07039	0.00016311	0.00086375	Up	gi|642917628|ref|XP_966714.3|/1.99918e-80/PREDICTED: dehydrogenase/reductase SDR family member 11-like [Tribolium castaneum]	NA	sp|Q71R50|DHR11_CHICK/2e-37/Dehydrogenase/reductase SDR family member 11 OS=Gallus gallus GN=DHRS11 PE=2 SV=1	tca:658671/9e-67/dehydrogenase/reductase SDR family member 11-like; K15890 NADP+-dependent farnesol dehydrogenase [EC:1.1.1.216]	alr2142/5e-18/---	PR00080/5.0E-5/Short-chain dehydrogenase/reductase (SDR) superfamily signature	NA
	CL568.Contig2_All	2.06414	4.28e-224	8.87e-222	Up	gi|642920923|ref|XP_008192617.1|/5.08873e-152/PREDICTED: aldose reductase isoform X2 [Tribolium castaneum]	gi|350397171|ref|XM_003484745.1|/2e-06/PREDICTED: Bombus impatiens probable N(2),N(2)-dimethylguanosine tRNA methyltransferase-like (LOC100749224), mRNA	sp|Q5ZK84|AK1A1_CHICK/9e-61/Alcohol dehydrogenase [NADP(+)] OS=Gallus gallus GN=AKR1A1 PE=2 SV=1	dme:Dmel_CG2767/3e-84/CG2767 gene product from transcript CG2767-RA (EC:1.1.1.2); K00002 alcohol dehydrogenase (NADP+) [EC:1.1.1.2]	ECU01g0970/7e-53/---	PS00062/-/Aldo/keto reductase family signature 2.	biological_process:GO:0055114//oxidation-reduction process;molecular_function:GO:0016491//oxidoreductase activity;
	CL568.Contig1_All	1.8172	7.23e-186	1.31e-183	Up	gi|642920923|ref|XP_008192617.1|/4.08809e-151/PREDICTED: aldose reductase isoform X2 [Tribolium castaneum]	NA	sp|Q5ZK84|AK1A1_CHICK/6e-60/Alcohol dehydrogenase [NADP(+)] OS=Gallus gallus GN=AKR1A1 PE=2 SV=1	dme:Dmel_CG2767/8e-83/CG2767 gene product from transcript CG2767-RA (EC:1.1.1.2); K00002 alcohol dehydrogenase (NADP+) [EC:1.1.1.2]	slr0942/3e-53/---	PS00063/-/Aldo/keto reductase family putative active site signature.	biological_process:GO:0055114//oxidation-reduction process;molecular_function:GO:0016491//oxidoreductase activity;
	Unigene2139_All	1.81022	3.22e-28	9.73e-27	Up	gi|642917628|ref|XP_966714.3|/4.31832e-111/PREDICTED: dehydrogenase/reductase SDR family member 11-like [Tribolium castaneum]	gi|462301513|gb|APGK01050565.1|/2e-06/Dendroctonus ponderosae Seq01050575, whole genome shotgun sequence	sp|Q71R50|DHR11_CHICK/1e-55/Dehydrogenase/reductase SDR family member 11 OS=Gallus gallus GN=DHRS11 PE=2 SV=1	tca:658671/9e-93/dehydrogenase/reductase SDR family member 11-like; K15890 NADP+-dependent farnesol dehydrogenase [EC:1.1.1.216]	SMa0320/1e-32/---	PR00080/1.2E-9/Short-chain dehydrogenase/reductase (SDR) superfamily signature	biological_process:GO:0055114//oxidation-reduction process;molecular_function:GO:0000166//nucleotide binding;GO:0016491//oxidoreductase activity;
	CL35.Contig1_All	1.61266	1.22e-111	1.46e-109	Up	gi|642917628|ref|XP_966714.3|/3.08754e-117/PREDICTED: dehydrogenase/reductase SDR family member 11-like [Tribolium castaneum]	gi|462301513|gb|APGK01050565.1|/2e-06/Dendroctonus ponderosae Seq01050575, whole genome shotgun sequence	sp|Q71R50|DHR11_CHICK/2e-52/Dehydrogenase/reductase SDR family member 11 OS=Gallus gallus GN=DHRS11 PE=2 SV=1	tca:658671/4e-94/dehydrogenase/reductase SDR family member 11-like; K15890 NADP+-dependent farnesol dehydrogenase [EC:1.1.1.216]	VNG0115G/1e-33/---	PR00080/2.3E-9/Short-chain dehydrogenase/reductase (SDR) superfamily signature	biological_process:GO:0055114//oxidation-reduction process;molecular_function:GO:0000166//nucleotide binding;GO:0016491//oxidoreductase activity;
	Unigene4798_All	1.48648	0.00012265	0.00066547	Up	gi|270004454|gb|EFA00902.1|/8.52497e-86/hypothetical protein TcasGA2_TC003807 [Tribolium castaneum]	NA	sp|Q71R50|DHR11_CHICK/4e-41/Dehydrogenase/reductase SDR family member 11 OS=Gallus gallus GN=DHRS11 PE=2 SV=1	tca:658671/2e-68/dehydrogenase/reductase SDR family member 11-like; K15890 NADP+-dependent farnesol dehydrogenase [EC:1.1.1.216]	SMa0320/1e-21/---	PTHR24322/1.5E-85/--	biological_process:GO:0008152//metabolic process;
	Unigene2413_All	1.36025	6.79e-05	0.00038672	Up	gi|270004454|gb|EFA00902.1|/1.08424e-40/hypothetical protein TcasGA2_TC003807 [Tribolium castaneum]	NA	sp|Q3ZBV9|DHR11_BOVIN/2e-15/Dehydrogenase/reductase SDR family member 11 OS=Bos taurus GN=DHRS11 PE=2 SV=1	tca:658671/2e-32/dehydrogenase/reductase SDR family member 11-like; K15890 NADP+-dependent farnesol dehydrogenase [EC:1.1.1.216]	Rv0547c/6e-13/---	PTHR24322/4.0E-41/--	NA
	CL1695.Contig1_All	1.09366	1.28e-13	1.89e-12	Up	gi|642935257|ref|XP_008197935.1|/0/PREDICTED: NADPH-dependent diflavin oxidoreductase 1 [Tribolium castaneum]	NA	sp|Q6PFP6|NDOR1_DANRE/2e-142/NADPH-dependent diflavin oxidoreductase 1 OS=Danio rerio GN=ndor1 PE=2 SV=1	tca:656967/0.0/NADPH-dependent diflavin oxidoreductase 1; K15014 solute carrier family 29 (equilibrative nucleoside transporter), member 1/2/3	SPAC1296.06/2e-67/---	PF00258/3.4E-21/Flavodoxin	NA
	CL145.Contig2_All	1.09055	1.27e-261	3.17e-259	Up	gi|642928374|ref|XP_008192717.1|/0/PREDICTED: C-1-tetrahydrofolate synthase, cytoplasmic isoform X1 [Tribolium castaneum]	gi|11094905|gb|AC084455.1|AC084455/1e-09/Caenorhabditis briggsae cosmid CB027N19, complete sequence	sp|Q27772|C1TC_SPOFR/0.0/C-1-tetrahydrofolate synthase, cytoplasmic OS=Spodoptera frugiperda PE=2 SV=3	tca:656820/0.0/C-1-tetrahydrofolate synthase, cytoplasmic; K00288 methylenetetrahydrofolate dehydrogenase (NADP+) / methenyltetrahydrofolate cyclohydrolase / formyltetrahydrofolate synthetase [EC:1.5.1.5 3.5.4.9 6.3.4.3]	SPBC839.16_2/0.0/---	PF00763/4.9E-36/Tetrahydrofolate dehydrogenase/cyclohydrolase, catalytic domain	NA
	Unigene14543_All	-10.0782	8.01e-17	1.44e-15	Down	gi|270004454|gb|EFA00902.1|/5.944e-65/hypothetical protein TcasGA2_TC003807 [Tribolium castaneum]	NA	sp|Q3U0B3|DHR11_MOUSE/2e-36/Dehydrogenase/reductase SDR family member 11 OS=Mus musculus GN=Dhrs11 PE=2 SV=1	tca:658671/3e-63/dehydrogenase/reductase SDR family member 11-like; K15890 NADP+-dependent farnesol dehydrogenase [EC:1.1.1.216]	MA2687/6e-21/---	PF00106/2.1E-24/short chain dehydrogenase	biological_process:GO:0055114//oxidation-reduction process;molecular_function:GO:0000166//nucleotide binding;GO:0016491//oxidoreductase activity;
	Unigene7628_All	-1.98601	2.65e-52	1.51e-50	Down	gi|270015067|gb|EFA11515.1|/1.36851e-170/hypothetical protein TcasGA2_TC014229 [Tribolium castaneum]	gi|380016269|ref|XM_003692062.1|/5e-07/PREDICTED: Apis florea trans-1,2-dihydrobenzene-1,2-diol dehydrogenase-like (LOC100865727), mRNA	sp|Q642M9|DHDH_DANRE/5e-75/Trans-1,2-dihydrobenzene-1,2-diol dehydrogenase OS=Danio rerio GN=dhdh PE=2 SV=2	tca:660272/3e-171/trans-1,2-dihydrobenzene-1,2-diol dehydrogenase-like; K00078 dihydrodiol dehydrogenase / D-xylose 1-dehydrogenase (NADP) [EC:1.3.1.20 1.1.1.179]	CAC1480/1e-40/---	PTHR22604/8.6E-80/--	biological_process:GO:0055114//oxidation-reduction process;molecular_function:GO:0000166//nucleotide binding;GO:0016491//oxidoreductase activity;
	CL3437.Contig2_All	-1.92029	1.17e-17	2.2e-16	Down	gi|642925809|ref|XP_969782.3|/1.2485e-115/PREDICTED: dehydrogenase/reductase SDR family member 11-like [Tribolium castaneum]	gi|78190096|gb|AC166108.4|/2e-21/Mus musculus BAC clone RP23-192E10 from chromosome 1, complete sequence	sp|Q3U0B3|DHR11_MOUSE/9e-48/Dehydrogenase/reductase SDR family member 11 OS=Mus musculus GN=Dhrs11 PE=2 SV=1	tca:658671/6e-92/dehydrogenase/reductase SDR family member 11-like; K15890 NADP+-dependent farnesol dehydrogenase [EC:1.1.1.216]	VNG0115G/1e-33/---	PTHR24322/7.3E-108/--	biological_process:GO:0055114//oxidation-reduction process;molecular_function:GO:0000166//nucleotide binding;GO:0016491//oxidoreductase activity;
	Unigene9048_All	-1.30122	1.66e-06	1.22e-05	Down	gi|642938932|ref|XP_970153.3|/9.98101e-103/PREDICTED: dehydrogenase/reductase SDR family member 11-like [Tribolium castaneum] &gt;gi|270016170|gb|EFA12618.1| hypothetical protein TcasGA2_TC010240 [Tribolium castaneum]	NA	sp|Q3ZBV9|DHR11_BOVIN/2e-51/Dehydrogenase/reductase SDR family member 11 OS=Bos taurus GN=DHRS11 PE=2 SV=1	tca:658671/7e-94/dehydrogenase/reductase SDR family member 11-like; K15890 NADP+-dependent farnesol dehydrogenase [EC:1.1.1.216]	SMa0320/5e-31/---	PR00080/2.1E-9/Short-chain dehydrogenase/reductase (SDR) superfamily signature	biological_process:GO:0055114//oxidation-reduction process;molecular_function:GO:0000166//nucleotide binding;GO:0016491//oxidoreductase activity;
	CL2946.Contig1_All	-1.17802	1.29e-207	2.5e-205	Down	gi|642912424|ref|XP_969226.2|/0/PREDICTED: NADP-dependent malic enzyme isoform X1 [Tribolium castaneum]	gi|383861915|ref|XM_003706382.1|/3e-50/PREDICTED: Megachile rotundata ras-related protein Rab-39B-like (LOC100876810), mRNA	sp|P28227|MAOX_ANAPL/0.0/NADP-dependent malic enzyme OS=Anas platyrhynchos GN=ME1 PE=1 SV=1	tca:657686/0.0/NADP-dependent malic enzyme; K00029 malate dehydrogenase (oxaloacetate-decarboxylating)(NADP+) [EC:1.1.1.40]	VC1188/1e-122/---	SM00919/4.7E-119/Malic enzyme, NAD binding domain	NA
	CL3437.Contig1_All	-1.06806	3.94e-09	3.97e-08	Down	gi|642925809|ref|XP_969782.3|/4.22292e-115/PREDICTED: dehydrogenase/reductase SDR family member 11-like [Tribolium castaneum]	gi|225632111|emb|AL844506.2|/8e-07/Plasmodium falciparum 3D7 chromosome 7	sp|Q3U0B3|DHR11_MOUSE/3e-47/Dehydrogenase/reductase SDR family member 11 OS=Mus musculus GN=Dhrs11 PE=2 SV=1	tca:658671/2e-91/dehydrogenase/reductase SDR family member 11-like; K15890 NADP+-dependent farnesol dehydrogenase [EC:1.1.1.216]	VNG0115G/4e-33/---	PTHR19446/7.5E-17/--	biological_process:GO:0055114//oxidation-reduction process;molecular_function:GO:0000166//nucleotide binding;GO:0016491//oxidoreductase activity;
NAD+	Unigene13564_All	8.07146	1.67e-06	1.23e-05	Up	gi|189236933|ref|XP_969947.2|/6.857e-79/PREDICTED: uncharacterized protein LOC658466 [Tribolium castaneum] &gt;gi|270008068|gb|EFA04516.1| hypothetical protein TcasGA2_TC016311 [Tribolium castaneum]	NA	sp|E9PAV3|NACAM_HUMAN/3e-07/Nascent polypeptide-associated complex subunit alpha, muscle-specific form OS=Homo sapiens GN=NACA PE=1 SV=1	api:100571286/1e-08/sialidase-like; K00030 isocitrate dehydrogenase (NAD+) [EC:1.1.1.41]	NA	PF00379/1.4E-9/Insect cuticle protein	NA
	CL1205.Contig2_All	3.35189	5.18e-94	5.33e-92	Up	gi|642914904|ref|XP_008190437.1|/0/PREDICTED: aldehyde dehydrogenase 5, mitochondrial-like [Tribolium castaneum]	gi|347966487|ref|XM_321338.3|/2e-16/Anopheles gambiae str. PEST AGAP001747-PA (AgaP_AGAP001747) mRNA, complete cds	sp|Q08DG6|COX15_BOVIN/3e-117/Cytochrome c oxidase assembly protein COX15 homolog OS=Bos taurus GN=COX15 PE=2 SV=1	tca:103312192/0.0/aldehyde dehydrogenase 5, mitochondrial-like; K00128 aldehyde dehydrogenase (NAD+) [EC:1.2.1.3]	YER141w/2e-74/---	PTHR11699:SF113/6.4E-52/--	biological_process:GO:0006784//heme a biosynthetic process;GO:0055114//oxidation-reduction process;cellular_component:GO:0016020//membrane;molecular_function:GO:0016627//oxidoreductase activity, acting on the CH-CH group of donors;
	CL1474.Contig1_All	1.32344	8.25e-42	3.68e-40	Up	gi|642933447|ref|XP_008197423.1|/1.37532e-153/PREDICTED: bifunctional methylenetetrahydrofolate dehydrogenase/cyclohydrolase, mitochondrial isoform X2 [Tribolium castaneum]	NA	sp|Q0P5C2|MTDC_BOVIN/2e-90/Bifunctional methylenetetrahydrofolate dehydrogenase/cyclohydrolase, mitochondrial OS=Bos taurus GN=MTHFD2 PE=2 SV=1	tca:662099/1e-153/bifunctional methylenetetrahydrofolate dehydrogenase/cyclohydrolase, mitochondrial; K13403 methylenetetrahydrofolate dehydrogenase(NAD+) / 5,10-methenyltetrahydrofolate cyclohydrolase [EC:1.5.1.15 3.5.4.9]	XF2431/2e-61/---	PF00763/2.3E-35/Tetrahydrofolate dehydrogenase/cyclohydrolase, catalytic domain	biological_process:GO:0055114//oxidation-reduction process;GO:0009396//folic acid-containing compound biosynthetic process;molecular_function:GO:0004488//methylenetetrahydrofolate dehydrogenase (NADP+) activity;GO:0000166//nucleotide binding;
	CL1474.Contig3_All	1.14596	4.39e-38	1.76e-36	Up	gi|642933445|ref|XP_008197422.1|/7.11687e-162/PREDICTED: bifunctional methylenetetrahydrofolate dehydrogenase/cyclohydrolase, mitochondrial isoform X1 [Tribolium castaneum]	NA	sp|Q04448|MTDC_DROME/4e-93/Bifunctional methylenetetrahydrofolate dehydrogenase/cyclohydrolase, mitochondrial OS=Drosophila melanogaster GN=Nmdmc PE=2 SV=2	tca:662099/1e-162/bifunctional methylenetetrahydrofolate dehydrogenase/cyclohydrolase, mitochondrial; K13403 methylenetetrahydrofolate dehydrogenase(NAD+) / 5,10-methenyltetrahydrofolate cyclohydrolase [EC:1.5.1.15 3.5.4.9]	XF2431/2e-63/---	PS00767/-/Tetrahydrofolate dehydrogenase/cyclohydrolase signature 2.	biological_process:GO:0055114//oxidation-reduction process;GO:0009396//folic acid-containing compound biosynthetic process;molecular_function:GO:0004488//methylenetetrahydrofolate dehydrogenase (NADP+) activity;GO:0000166//nucleotide binding;
FAD	CL2232.Contig3_All	8.38802	9.27e-11	1.1e-09	Up	gi|642936081|ref|XP_008198295.1|/2.08367e-94/PREDICTED: FAD synthase-like [Tribolium castaneum]	NA	sp|Q68EH8|FAD1_DANRE/3e-44/FAD synthase OS=Danio rerio GN=flad1 PE=2 SV=1	tca:663343/3e-95/FAD synthase-like; K00953 FAD synthetase [EC:2.7.7.2]	AF2251/9e-27/---	SM00852/0.0029/Probable molybdopterin binding domain	NA
	Unigene8964_All	-2.67896	3.01e-37	1.18e-35	Down	gi|642921077|ref|XP_008192683.1|/0/PREDICTED: glucose dehydrogenase [FAD, quinone] [Tribolium castaneum]	NA	sp|P18172|DHGL_DROPS/5e-106/Glucose dehydrogenase [FAD, quinone] OS=Drosophila pseudoobscura pseudoobscura GN=Gld PE=3 SV=4	api:100161006/1e-136/glucose dehydrogenase [FAD, quinone]-like; K00108 choline dehydrogenase [EC:1.1.99.1]	mll1008/1e-82/---	PF05199/3.4E-36/GMC oxidoreductase	NA
	Unigene5312_All	-1.81427	1.24e-50	6.75e-49	Down	gi|642920578|ref|XP_008192471.1|/0/PREDICTED: glucose dehydrogenase [FAD, quinone]-like [Tribolium castaneum]	NA	sp|P18172|DHGL_DROPS/4e-94/Glucose dehydrogenase [FAD, quinone] OS=Drosophila pseudoobscura pseudoobscura GN=Gld PE=3 SV=4	tca:103312774/0.0/glucose dehydrogenase [FAD, quinone]-like; K00115 glucose dehydrogenase (acceptor) [EC:1.1.5.9]	mll1008/1e-76/---	PS00624/-/GMC oxidoreductases signature 2.	biological_process:GO:0044710//single-organism metabolic process;molecular_function:GO:0016614//oxidoreductase activity, acting on CH-OH group of donors;
cytochrome c oxidase	CL2987.Contig2_All	3.16993	8.95e-24	2.3e-22	Up	gi|642913150|ref|XP_008201413.1|/0/PREDICTED: multiple epidermal growth factor-like domains protein 10 isoform X2 [Tribolium castaneum]	NA	sp|Q96KG7|MEG10_HUMAN/0.0/Multiple epidermal growth factor-like domains protein 10 OS=Homo sapiens GN=MEGF10 PE=1 SV=1	hmg:100209451/3e-144/multiple epidermal growth factor-like domains protein 10; K02258 cytochrome c oxidase assembly protein subunit 11	NA	PS01186/-/EGF-like domain signature 2.	NA
transporting atpase	CL925.Contig2_All	7.49185	3.84e-17	7.04e-16	Up	gi|642935348|ref|XP_008197977.1|/0/PREDICTED: inactive pancreatic lipase-related protein 1 isoform X1 [Tribolium castaneum]	NA	sp|P54316|LIPR1_RAT/5e-64/Inactive pancreatic lipase-related protein 1 OS=Rattus norvegicus GN=Pnliprp1 PE=2 SV=1	tca:657437/2e-138/uncharacterized LOC657437; K03662 V-type H+-transporting ATPase S1 subunit	NA	PF00151/4.9E-78/Lipase	biological_process:GO:0006629//lipid metabolic process;cellular_component:GO:0005576//extracellular region;molecular_function:GO:0004806//triglyceride lipase activity;
	CL925.Contig1_All	5.72792	1.36e-05	8.77e-05	Up	gi|642935348|ref|XP_008197977.1|/0/PREDICTED: inactive pancreatic lipase-related protein 1 isoform X1 [Tribolium castaneum]	NA	sp|Q6P8U6|LIPP_MOUSE/8e-59/Pancreatic triacylglycerol lipase OS=Mus musculus GN=Pnlip PE=1 SV=1	tca:657437/2e-138/uncharacterized LOC657437; K03662 V-type H+-transporting ATPase S1 subunit	NA	PTHR12471/1.9E-22/--	biological_process:GO:0006629//lipid metabolic process;cellular_component:GO:0005576//extracellular region;molecular_function:GO:0004806//triglyceride lipase activity;
	CL3751.Contig1_All	2.3322	5.66e-05	0.000326	Up	gi|642934400|ref|XP_008197643.1|/4.14733e-16/PREDICTED: micronuclear linker histone polyprotein-like isoform X2 [Tribolium castaneum]	NA	NA	tca:657737/6e-07/ATP synthase-coupling factor 6, mitochondrial; K02131 F-type H+-transporting ATPase subunit 6	NA	NA	NA
	CL925.Contig4_All	1.6477	3.58e-06	2.51e-05	Up	gi|642935348|ref|XP_008197977.1|/0/PREDICTED: inactive pancreatic lipase-related protein 1 isoform X1 [Tribolium castaneum]	NA	sp|Q6P8U6|LIPP_MOUSE/8e-59/Pancreatic triacylglycerol lipase OS=Mus musculus GN=Pnlip PE=1 SV=1	tca:657437/2e-138/uncharacterized LOC657437; K03662 V-type H+-transporting ATPase S1 subunit	NA	PTHR12471/1.9E-22/--	biological_process:GO:0006629//lipid metabolic process;cellular_component:GO:0005576//extracellular region;molecular_function:GO:0004806//triglyceride lipase activity;
	CL925.Contig8_All	1.64147	3.51e-20	7.67e-19	Up	gi|91090488|ref|XP_968919.1|/0/PREDICTED: inactive pancreatic lipase-related protein 1 isoform X2 [Tribolium castaneum] &gt;gi|270013864|gb|EFA10312.1| hypothetical protein TcasGA2_TC012528 [Tribolium castaneum]	NA	sp|Q6P8U6|LIPP_MOUSE/4e-59/Pancreatic triacylglycerol lipase OS=Mus musculus GN=Pnlip PE=1 SV=1	tca:657437/2e-138/uncharacterized LOC657437; K03662 V-type H+-transporting ATPase S1 subunit	NA	PF00151/8.8E-70/Lipase	biological_process:GO:0006629//lipid metabolic process;cellular_component:GO:0005576//extracellular region;molecular_function:GO:0004806//triglyceride lipase activity;
	CL925.Contig10_All	1.59525	8.54e-06	5.67e-05	Up	gi|642935348|ref|XP_008197977.1|/5.88793e-58/PREDICTED: inactive pancreatic lipase-related protein 1 isoform X1 [Tribolium castaneum]	NA	NA	tca:657437/3e-26/uncharacterized LOC657437; K03662 V-type H+-transporting ATPase S1 subunit	NA	PTHR11610:SF83/4.9E-21/--	biological_process:GO:0006629//lipid metabolic process;cellular_component:GO:0005576//extracellular region;molecular_function:GO:0004806//triglyceride lipase activity;
	CL57.Contig1_All	1.38676	2.95e-07	2.41e-06	Up	gi|642926777|ref|XP_008195010.1|/0/PREDICTED: copper-transporting ATPase 1 isoform X7 [Tribolium castaneum]	gi|380014297|ref|XM_003691128.1|/2e-22/PREDICTED: Apis florea copper-transporting ATPase 1-like (LOC100867919), mRNA	sp|P70705|ATP7A_RAT/2e-175/Copper-transporting ATPase 1 OS=Rattus norvegicus GN=Atp7a PE=1 SV=1	tca:656862/0.0/copper-transporting ATPase 1; K17686 Cu+-exporting ATPase [EC:3.6.3.54]	alr1627/4e-106/---	PF00122/6.1E-32/E1-E2 ATPase	NA
	CL925.Contig7_All	1.29498	6.48e-43	2.96e-41	Up	gi|91090488|ref|XP_968919.1|/0/PREDICTED: inactive pancreatic lipase-related protein 1 isoform X2 [Tribolium castaneum] &gt;gi|270013864|gb|EFA10312.1| hypothetical protein TcasGA2_TC012528 [Tribolium castaneum]	NA	sp|P54316|LIPR1_RAT/2e-64/Inactive pancreatic lipase-related protein 1 OS=Rattus norvegicus GN=Pnliprp1 PE=2 SV=1	tca:657437/2e-138/uncharacterized LOC657437; K03662 V-type H+-transporting ATPase S1 subunit	NA	PTHR11610/2.2E-181/--	biological_process:GO:0006629//lipid metabolic process;cellular_component:GO:0005576//extracellular region;molecular_function:GO:0004806//triglyceride lipase activity;
	CL925.Contig5_All	1.12575	7.68e-10	8.37e-09	Up	gi|642935348|ref|XP_008197977.1|/0/PREDICTED: inactive pancreatic lipase-related protein 1 isoform X1 [Tribolium castaneum]	NA	sp|P54316|LIPR1_RAT/3e-64/Inactive pancreatic lipase-related protein 1 OS=Rattus norvegicus GN=Pnliprp1 PE=2 SV=1	tca:657437/2e-138/uncharacterized LOC657437; K03662 V-type H+-transporting ATPase S1 subunit	NA	PTHR11610/3.3E-182/--	biological_process:GO:0006629//lipid metabolic process;cellular_component:GO:0005576//extracellular region;molecular_function:GO:0004806//triglyceride lipase activity;
	CL925.Contig9_All	-7.45533	1.78e-08	1.68e-07	Down	gi|642935348|ref|XP_008197977.1|/3.3322e-63/PREDICTED: inactive pancreatic lipase-related protein 1 isoform X1 [Tribolium castaneum]	NA	NA	tca:657437/3e-26/uncharacterized LOC657437; K03662 V-type H+-transporting ATPase S1 subunit	NA	PTHR11610/2.1E-23/--	biological_process:GO:0006629//lipid metabolic process;cellular_component:GO:0005576//extracellular region;molecular_function:GO:0004806//triglyceride lipase activity;
	CL925.Contig6_All	-3.64284	8.74e-45	4.14e-43	Down	gi|91090488|ref|XP_968919.1|/0/PREDICTED: inactive pancreatic lipase-related protein 1 isoform X2 [Tribolium castaneum] &gt;gi|270013864|gb|EFA10312.1| hypothetical protein TcasGA2_TC012528 [Tribolium castaneum]	NA	sp|P54316|LIPR1_RAT/3e-64/Inactive pancreatic lipase-related protein 1 OS=Rattus norvegicus GN=Pnliprp1 PE=2 SV=1	tca:657437/2e-138/uncharacterized LOC657437; K03662 V-type H+-transporting ATPase S1 subunit	NA	PR00823/1.1E-8/Pancreatic lipase signature	biological_process:GO:0006629//lipid metabolic process;cellular_component:GO:0005576//extracellular region;molecular_function:GO:0004806//triglyceride lipase activity;
	CL925.Contig3_All	-3.05889	1.7e-09	1.78e-08	Down	gi|91090488|ref|XP_968919.1|/0/PREDICTED: inactive pancreatic lipase-related protein 1 isoform X2 [Tribolium castaneum] &gt;gi|270013864|gb|EFA10312.1| hypothetical protein TcasGA2_TC012528 [Tribolium castaneum]	NA	sp|Q6P8U6|LIPP_MOUSE/4e-59/Pancreatic triacylglycerol lipase OS=Mus musculus GN=Pnlip PE=1 SV=1	tca:657437/2e-138/uncharacterized LOC657437; K03662 V-type H+-transporting ATPase S1 subunit	NA	PF00151/8.8E-70/Lipase	biological_process:GO:0006629//lipid metabolic process;cellular_component:GO:0005576//extracellular region;molecular_function:GO:0004806//triglyceride lipase activity;
	CL361.Contig6_All	-2.17509	5.04e-05	0.000294	Down	gi|642938587|ref|XP_008199853.1|/0/PREDICTED: plasma membrane calcium-transporting ATPase 2 isoform X2 [Tribolium castaneum]	gi|498985551|ref|XM_004530576.1|/2e-66/PREDICTED: Ceratitis capitata plasma membrane calcium-transporting ATPase 3-like (LOC101455930), transcript variant X9, mRNA	sp|Q16720|AT2B3_HUMAN/0.0/Plasma membrane calcium-transporting ATPase 3 OS=Homo sapiens GN=ATP2B3 PE=1 SV=3	tca:656486/0.0/plasma membrane calcium-transporting ATPase 1; K05850 Ca2+ transporting ATPase, plasma membrane [EC:3.6.3.8]	CAC2137/2e-64/---	PF00702/1.0E-23/haloacid dehalogenase-like hydrolase	biological_process:GO:0070588//calcium ion transmembrane transport;cellular_component:GO:0016021//integral component of membrane;molecular_function:GO:0046872//metal ion binding;GO:0005524//ATP binding;GO:0005388//calcium-transporting ATPase activity;
	CL361.Contig3_All	-1.97884	1.02e-38	4.17e-37	Down	gi|642938589|ref|XP_008199854.1|/0/PREDICTED: plasma membrane calcium-transporting ATPase 2 isoform X3 [Tribolium castaneum]	gi|498985551|ref|XM_004530576.1|/7e-66/PREDICTED: Ceratitis capitata plasma membrane calcium-transporting ATPase 3-like (LOC101455930), transcript variant X9, mRNA	sp|Q16720|AT2B3_HUMAN/0.0/Plasma membrane calcium-transporting ATPase 3 OS=Homo sapiens GN=ATP2B3 PE=1 SV=3	tca:656486/0.0/plasma membrane calcium-transporting ATPase 1; K05850 Ca2+ transporting ATPase, plasma membrane [EC:3.6.3.8]	mll5286/0.0/---	PF12424/3.5E-5/Plasma membrane calcium transporter ATPase C terminal	biological_process:GO:0070588//calcium ion transmembrane transport;cellular_component:GO:0016021//integral component of membrane;molecular_function:GO:0046872//metal ion binding;GO:0005524//ATP binding;GO:0005388//calcium-transporting ATPase activity;
	CL423.Contig1_All	-1.80506	7.46e-05	0.000421	Down	gi|270011001|gb|EFA07449.1|/6.78456e-19/hypothetical protein TcasGA2_TC009033 [Tribolium castaneum]	NA	sp|Q00361|ATP5I_BOVIN/3e-07/ATP synthase subunit e, mitochondrial OS=Bos taurus GN=ATP5I PE=1 SV=2	tca:657625/1e-16/ATP synthase subunit e, mitochondrial; K02129 F-type H+-transporting ATPase subunit e	NA	PTHR12427:SF0/2.8E-14/--	NA
	CL3280.Contig1_All	-1.25074	0	0	Down	gi|642935904|ref|XP_008198222.1|/0/PREDICTED: calcium-transporting ATPase sarcoplasmic/endoplasmic reticulum type isoform X2 [Tribolium castaneum] &gt;gi|270013982|gb|EFA10430.1| hypothetical protein TcasGA2_TC012671 [Tribolium castaneum]	gi|350403499|ref|XM_003486771.1|/0.0/PREDICTED: Bombus impatiens calcium-transporting ATPase sarcoplasmic/endoplasmic reticulum type-like (LOC100741129), mRNA	sp|Q7PPA5|ATC1_ANOGA/0.0/Calcium-transporting ATPase sarcoplasmic/endoplasmic reticulum type OS=Anopheles gambiae GN=Ca-P60A PE=3 SV=5	tca:658328/0.0/calcium-transporting atpase sarcoplasmic/endoplasmic reticulum type; K05853 Ca2+ transporting ATPase, sarcoplasmic/endoplasmic reticulum [EC:3.6.3.8]	BS_yloB/3e-153/---	PTHR24093/0.0/--	biological_process:GO:0006816//calcium ion transport;cellular_component:GO:0016021//integral component of membrane;molecular_function:GO:0046872//metal ion binding;GO:0005524//ATP binding;GO:0005388//calcium-transporting ATPase activity;
	CL361.Contig5_All	-1.19574	2.65e-42	1.2e-40	Down	gi|642938577|ref|XP_008199848.1|/0/PREDICTED: plasma membrane calcium-transporting ATPase 2 isoform X1 [Tribolium castaneum] &gt;gi|642938579|ref|XP_008199849.1| PREDICTED: plasma membrane calcium-transporting ATPase 2 isoform X1 [Tribolium castaneum] &gt;gi|642938581|ref|XP_008199850.1| PREDICTED: plasma membrane calcium-transporting ATPase 2 isoform X1 [Tribolium castaneum] &gt;gi|642938583|ref…	gi|498985551|ref|XM_004530576.1|/8e-66/PREDICTED: Ceratitis capitata plasma membrane calcium-transporting ATPase 3-like (LOC101455930), transcript variant X9, mRNA	sp|Q16720|AT2B3_HUMAN/0.0/Plasma membrane calcium-transporting ATPase 3 OS=Homo sapiens GN=ATP2B3 PE=1 SV=3	tca:656486/0.0/plasma membrane calcium-transporting ATPase 1; K05850 Ca2+ transporting ATPase, plasma membrane [EC:3.6.3.8]	mll5286/0.0/---	PF00690/3.3E-16/Cation transporter/ATPase, N-terminus	biological_process:GO:0070588//calcium ion transmembrane transport;cellular_component:GO:0016021//integral component of membrane;molecular_function:GO:0046872//metal ion binding;GO:0005524//ATP binding;GO:0005388//calcium-transporting ATPase activity;
	CL2272.Contig1_All	-1.11601	2.96e-37	1.16e-35	Down	gi|642930474|ref|XP_008196417.1|/0/PREDICTED: sodium/potassium-transporting ATPase subunit alpha isoform X1 [Tribolium castaneum]	gi|407731617|gb|JQ771526.1|/0.0/Tetraopes tetrophthalmus Na+,K+ ATPase alpha-subunit 1 mRNA, complete cds	sp|P13607|ATNA_DROME/0.0/Sodium/potassium-transporting ATPase subunit alpha OS=Drosophila melanogaster GN=Atpalpha PE=1 SV=3	tca:663833/0.0/sodium/potassium-transporting ATPase subunit alpha; K01539 sodium/potassium-transporting ATPase subunit alpha [EC:3.6.3.9]	MA4378/0.0/---	PTHR24093:SF244/0.0/--	NA
TCA	CL1851.Contig2_All	1.32931	1.1e-05	7.16e-05	Up	gi|642931526|ref|XP_008196622.1|/2.84836e-154/PREDICTED: 227 kDa spindle- and centromere-associated protein isoform X1 [Tribolium castaneum]	NA	sp|Q7SXT7|ZC21A_DANRE/9e-30/Zinc finger C2HC domain-containing protein 1A OS=Danio rerio GN=zc2hc1a PE=2 SV=1	cfo:105251968/4e-36/succinate dehydrogenase [ubiquinone] flavoprotein subunit, mitochondrial-like; K00234 succinate dehydrogenase (ubiquinone) flavoprotein subunit [EC:1.3.5.1]	FN0522/6e-08/---	PTHR13555/1.1E-37/--	NA
	CL3036.Contig2_All	1.4904	5.98e-10	6.6e-09	Up	gi|642911031|ref|XP_008193516.1|/9.43587e-122/PREDICTED: cytoplasmic polyadenylation element-binding protein 2 [Tribolium castaneum]	gi|462332951|gb|APGK01039145.1|/5e-10/Dendroctonus ponderosae Seq01039155, whole genome shotgun sequence	sp|Q8IYB3|SRRM1_HUMAN/4e-06/Serine/arginine repetitive matrix protein 1 OS=Homo sapiens GN=SRRM1 PE=1 SV=2	tca:657803/1e-122/orb2; probable RNA-binding protein orb2; K02602 cytoplasmic polyadenylation element-binding protein	NA	NA	NA
	CL3036.Contig1_All	-1.41122	1.05e-16	1.86e-15	Down	gi|642911031|ref|XP_008193516.1|/1.4832e-148/PREDICTED: cytoplasmic polyadenylation element-binding protein 2 [Tribolium castaneum]	gi|462332951|gb|APGK01039145.1|/4e-10/Dendroctonus ponderosae Seq01039155, whole genome shotgun sequence	sp|Q8IYB3|SRRM1_HUMAN/3e-06/Serine/arginine repetitive matrix protein 1 OS=Homo sapiens GN=SRRM1 PE=1 SV=2	tca:657803/2e-149/orb2; probable RNA-binding protein orb2; K02602 cytoplasmic polyadenylation element-binding protein	NA	NA	NA
	Unigene16688_All	-4.02035	2.4e-08	2.24e-07	Down	gi|91084487|ref|XP_971744.1|/2.51093e-74/PREDICTED: equilibrative nucleoside transporter 3 [Tribolium castaneum] &gt;gi|270008874|gb|EFA05322.1| hypothetical protein TcasGA2_TC015480 [Tribolium castaneum]	gi|91084486|ref|XM_966651.1|/3e-18/PREDICTED: Tribolium castaneum equilibrative nucleoside transporter 3 (LOC660420), mRNA	sp|Q80WK7|S29A3_RAT/4e-20/Equilibrative nucleoside transporter 3 OS=Rattus norvegicus GN=Slc29a3 PE=1 SV=2	tca:660420/5e-75/equilibrative nucleoside transporter 3; K15014 solute carrier family 29 (equilibrative nucleoside transporter), member 1/2/3	NA	PTHR10332:SF10/2.0E-30/--	biological_process:GO:0006810//transport;cellular_component:GO:0016021//integral component of membrane;molecular_function:GO:0005337//nucleoside transmembrane transporter activity;
Glycan biosynthesis and metabolism	CL2229.Contig4_All	1.20645	9.97e-07	7.58e-06	Up	gi|641654258|ref|XP_008179138.1|/5.79928e-73/PREDICTED: uncharacterized protein K02A2.6-like [Acyrthosiphon pisum]	NA	sp|Q09575|YRD6_CAEEL/6e-35/Uncharacterized protein K02A2.6 OS=Caenorhabditis elegans GN=K02A2.6 PE=4 SV=1	lcm:102365365/6e-13/uncharacterized LOC102365365; K11126 telomerase reverse transcriptase [EC:2.7.7.49]	YIL082w-a_2/5e-17/---	PTHR24559:SF165/1.0E-32/--	NA
	CL2229.Contig3_All	-1.61411	4.71e-05	0.000277	Down	gi|270016330|gb|EFA12776.1|/2.51769e-48/hypothetical protein TcasGA2_TC005019 [Tribolium castaneum]	NA	sp|P04323|POL3_DROME/2e-17/Retrovirus-related Pol polyprotein from transposon 17.6 OS=Drosophila melanogaster GN=pol PE=4 SV=1	lcm:102365365/5e-13/uncharacterized LOC102365365; K11126 telomerase reverse transcriptase [EC:2.7.7.49]	YGR109w-b_2/1e-16/---	PS50994/13.351/Integrase catalytic domain profile.	NA
	CL1565.Contig4_All	1.16534	4.09e-13	5.83e-12	Up	gi|642933639|ref|XP_008197506.1|/0/PREDICTED: phosphatidylinositol N-acetylglucosaminyltransferase subunit Q isoform X1 [Tribolium castaneum]	NA	sp|Q9QYT7|PIGQ_MOUSE/3e-47/Phosphatidylinositol N-acetylglucosaminyltransferase subunit Q OS=Mus musculus GN=Pigq PE=2 SV=3	tca:103314153/0.0/phosphatidylinositol N-acetylglucosaminyltransferase subunit Q; K03860 phosphatidylinositol glycan, class Q	TM1182/1e-08/---	PF05024/2.6E-56/N-acetylglucosaminyl transferase component (Gpi1)	NA
	Unigene13883_All	-4.87699	3.37e-16	5.83e-15	Down	gi|642932284|ref|XP_008197048.1|/0/PREDICTED: lysosomal alpha-mannosidase-like [Tribolium castaneum] &gt;gi|270012319|gb|EFA08767.1| hypothetical protein TcasGA2_TC006455 [Tribolium castaneum]	gi|237681163|ref|NM_001160255.1|/1e-38/Tribolium castaneum lysosomal alpha-mannosidase-like (LOC656698), mRNA	sp|Q8VHC8|MA2B1_CAVPO/2e-118/Lysosomal alpha-mannosidase OS=Cavia porcellus GN=MAN2B1 PE=1 SV=1	tca:656617/0.0/lysosomal alpha-mannosidase-like; K12311 lysosomal alpha-mannosidase [EC:3.2.1.24]	MT0676/6e-09/---	SM00872/2.8E-22/Alpha mannosidase, middle domain	biological_process:GO:0006013//mannose metabolic process;molecular_function:GO:0030246//carbohydrate binding;GO:0008270//zinc ion binding;GO:0004559//alpha-mannosidase activity;
	Unigene6458_All	-2.09946	2.98e-95	3.13e-93	Down	gi|91079939|ref|XP_968354.1|/0/PREDICTED: lysosomal alpha-mannosidase [Tribolium castaneum] &gt;gi|270003259|gb|EEZ99706.1| hypothetical protein TcasGA2_TC002467 [Tribolium castaneum]	gi|544509012|ref|XM_005588123.1|/4e-06/PREDICTED: Macaca fascicularis mannosidase, alpha, class 2B, member 1 (MAN2B1), transcript variant X3, mRNA	sp|Q8VHC8|MA2B1_CAVPO/0.0/Lysosomal alpha-mannosidase OS=Cavia porcellus GN=MAN2B1 PE=1 SV=1	tca:656754/0.0/lysosomal alpha-mannosidase; K12311 lysosomal alpha-mannosidase [EC:3.2.1.24]	TM1851/7e-15/---	PF09261/4.1E-17/Alpha mannosidase, middle domain	biological_process:GO:0006013//mannose metabolic process;molecular_function:GO:0030246//carbohydrate binding;GO:0008270//zinc ion binding;GO:0004559//alpha-mannosidase activity;
	Unigene1236_All	-1.98368	5.97e-27	1.72e-25	Down	gi|642918362|ref|XP_008200004.1|/0/PREDICTED: lysosomal alpha-mannosidase-like [Tribolium castaneum]	NA	sp|Q29451|MA2B1_BOVIN/0.0/Lysosomal alpha-mannosidase OS=Bos taurus GN=MAN2B1 PE=1 SV=4	tca:656928/0.0/lysosomal alpha-mannosidase-like; K12311 lysosomal alpha-mannosidase [EC:3.2.1.24]	MT0676/2e-13/---	PF09261/9.3E-22/Alpha mannosidase, middle domain	biological_process:GO:0005975//carbohydrate metabolic process;molecular_function:GO:0015923//mannosidase activity;GO:0005488//binding;
	CL1031.Contig2_All	-1.59021	1.44e-05	9.23e-05	Down	gi|642932284|ref|XP_008197048.1|/1.26895e-157/PREDICTED: lysosomal alpha-mannosidase-like [Tribolium castaneum] &gt;gi|270012319|gb|EFA08767.1| hypothetical protein TcasGA2_TC006455 [Tribolium castaneum]	gi|237681163|ref|NM_001160255.1|/8e-27/Tribolium castaneum lysosomal alpha-mannosidase-like (LOC656698), mRNA	sp|O09159|MA2B1_MOUSE/4e-59/Lysosomal alpha-mannosidase OS=Mus musculus GN=Man2b1 PE=2 SV=4	tca:656617/2e-158/lysosomal alpha-mannosidase-like; K12311 lysosomal alpha-mannosidase [EC:3.2.1.24]	NA	PF07748/1.5E-59/Glycosyl hydrolases family 38 C-terminal domain	biological_process:GO:0006013//mannose metabolic process;molecular_function:GO:0030246//carbohydrate binding;GO:0008270//zinc ion binding;GO:0004559//alpha-mannosidase activity;
	CL1031.Contig1_All	-1.53079	1.39e-69	1.07e-67	Down	gi|237681164|ref|NP_001153727.1|/0/lysosomal alpha-mannosidase-like precursor [Tribolium castaneum]	gi|237681163|ref|NM_001160255.1|/0.0/Tribolium castaneum lysosomal alpha-mannosidase-like (LOC656698), mRNA	sp|Q8VHC8|MA2B1_CAVPO/0.0/Lysosomal alpha-mannosidase OS=Cavia porcellus GN=MAN2B1 PE=1 SV=1	tca:656698/0.0/lysosomal alpha-mannosidase-like; K12311 lysosomal alpha-mannosidase [EC:3.2.1.24]	MT0676/3e-10/---	PTHR11607:SF3/0.0/--	biological_process:GO:0006013//mannose metabolic process;molecular_function:GO:0030246//carbohydrate binding;GO:0008270//zinc ion binding;GO:0004559//alpha-mannosidase activity;
	Unigene8614_All	-1.29105	2.39e-104	2.67e-102	Down	gi|91079945|ref|XP_968596.1|/0/PREDICTED: lysosomal alpha-mannosidase [Tribolium castaneum] &gt;gi|270003256|gb|EEZ99703.1| hypothetical protein TcasGA2_TC002464 [Tribolium castaneum]	gi|112420286|gb|BT027103.1|/1e-09/Gasterosteus aculeatus clone CFW172-A01 mRNA sequence	sp|Q8VHC8|MA2B1_CAVPO/0.0/Lysosomal alpha-mannosidase OS=Cavia porcellus GN=MAN2B1 PE=1 SV=1	tca:657014/0.0/lysosomal alpha-mannosidase; K12311 lysosomal alpha-mannosidase [EC:3.2.1.24]	MT0676/1e-10/---	PTHR11607:SF3/0.0/--	biological_process:GO:0006013//mannose metabolic process;molecular_function:GO:0030246//carbohydrate binding;GO:0008270//zinc ion binding;GO:0004559//alpha-mannosidase activity;
	Unigene9139_All	-1.15353	9.78e-07	7.44e-06	Down	gi|642918403|ref|XP_008200174.1|/0/PREDICTED: lysosomal alpha-mannosidase-like [Tribolium castaneum]	NA	sp|O46432|MA2B1_FELCA/6e-111/Lysosomal alpha-mannosidase OS=Felis catus GN=MAN2B1 PE=2 SV=1	tca:656843/0.0/lysosomal alpha-mannosidase-like; K12311 lysosomal alpha-mannosidase [EC:3.2.1.24]	NA	PF07748/2.1E-73/Glycosyl hydrolases family 38 C-terminal domain	biological_process:GO:0005975//carbohydrate metabolic process;molecular_function:GO:0015923//mannosidase activity;GO:0005488//binding;
	CL2460.Contig2_All	-2.87388	1.5e-147	2.21e-145	Down	gi|642937608|ref|XP_008199119.1|/0/PREDICTED: neutral alpha-glucosidase AB-like [Tribolium castaneum]	NA	sp|P79403|GANAB_PIG/3e-161/Neutral alpha-glucosidase AB OS=Sus scrofa GN=GANAB PE=1 SV=1	tca:655466/0.0/neutral alpha-glucosidase AB-like; K05546 alpha 1,3-glucosidase [EC:3.2.1.84]	SPAC1002.03c/4e-133/---	PTHR22762:SF54/0.0/--	NA
	Unigene1776_All	-2.61995	1.61e-50	8.74e-49	Down	gi|189241705|ref|XP_967022.2|/1.21783e-69/PREDICTED: neutral alpha-glucosidase C-like [Tribolium castaneum]	NA	sp|Q94502|GANAB_DICDI/2e-14/Neutral alpha-glucosidase AB OS=Dictyostelium discoideum GN=modA PE=3 SV=1	tca:655389/2e-70/neutral alpha-glucosidase C-like; K05546 alpha 1,3-glucosidase [EC:3.2.1.84]	YBR229c/3e-08/---	PTHR22762/5.9E-29/--	NA
	Unigene1054_All	-1.89433	0	0	Down	gi|91081577|ref|XP_975228.1|/0/PREDICTED: maltase 2 [Tribolium castaneum] &gt;gi|270006189|gb|EFA02637.1| hypothetical protein TcasGA2_TC008358 [Tribolium castaneum]	NA	sp|O16099|MAL2_DROVI/9e-161/Maltase 2 OS=Drosophila virilis GN=Mal-B2 PE=3 SV=2	tca:664120/0.0/maltase 2; K01187 alpha-glucosidase [EC:3.2.1.20]	DR1375/8e-101/---	PTHR10357:SF76/3.4E-228/--	biological_process:GO:0005975//carbohydrate metabolic process;molecular_function:GO:0043169//cation binding;GO:0003824//catalytic activity;
	CL870.Contig2_All	-1.38777	2.89e-76	2.4e-74	Down	gi|189241705|ref|XP_967022.2|/0/PREDICTED: neutral alpha-glucosidase C-like [Tribolium castaneum]	NA	sp|Q8BHN3|GANAB_MOUSE/3e-106/Neutral alpha-glucosidase AB OS=Mus musculus GN=Ganab PE=1 SV=1	tca:655389/0.0/neutral alpha-glucosidase C-like; K05546 alpha 1,3-glucosidase [EC:3.2.1.84]	SPAC1002.03c/7e-85/---	PF01055/1.1E-87/Glycosyl hydrolases family 31	NA
	CL1365.Contig1_All	1.00289	1.33e-12	1.85e-11	Up	gi|642914535|ref|XP_008201718.1|/0/PREDICTED: Hermansky-Pudlak syndrome 1 protein homolog isoform X1 [Tribolium castaneum]	gi|380024448|ref|XM_003695960.1|/5e-08/PREDICTED: Apis florea Hermansky-Pudlak syndrome 1 protein homolog (LOC100865990), mRNA	sp|Q60HF3|HPS1_MACFA/4e-44/Hermansky-Pudlak syndrome 1 protein homolog OS=Macaca fascicularis GN=HPS1 PE=2 SV=1	gfr:102042550/7e-34/HPS1; Hermansky-Pudlak syndrome 1; K07965 heparanase 2 [EC:3.2.1.-]	NA	PTHR12761/7.9E-110/--	NA
	CL824.Contig1_All	-1.29509	4.4e-38	1.76e-36	Down	gi|91089481|ref|XP_969353.1|/0/PREDICTED: beta-glucuronidase [Tribolium castaneum] &gt;gi|270011394|gb|EFA07842.1| hypothetical protein TcasGA2_TC005412 [Tribolium castaneum]	gi|549438518|gb|KC282391.1|/2e-13/Leptinotarsa decemlineata clone 3-2227 beta-glucuronidase-like protein mRNA, complete cds	sp|O97524|BGLR_FELCA/2e-159/Beta-glucuronidase OS=Felis catus GN=GUSB PE=1 SV=1	tca:657825/0.0/beta-glucuronidase; K01195 beta-glucuronidase [EC:3.2.1.31]	uidA/1e-130/---	PF02837/2.0E-45/Glycosyl hydrolases family 2, sugar binding domain	biological_process:GO:0005975//carbohydrate metabolic process;molecular_function:GO:0004553//hydrolase activity, hydrolyzing O-glycosyl compounds;
	Unigene6187_All	-3.94017	2.66e-11	3.3e-10	Down	gi|270003258|gb|EEZ99705.1|/2.34911e-128/hypothetical protein TcasGA2_TC002466 [Tribolium castaneum]	NA	sp|Q29451|MA2B1_BOVIN/4e-66/Lysosomal alpha-mannosidase OS=Bos taurus GN=MAN2B1 PE=1 SV=4	tca:656754/3e-101/lysosomal alpha-mannosidase; K12311 lysosomal alpha-mannosidase [EC:3.2.1.24]	MT0676/6e-09/---	PTHR11607/7.7E-128/--	biological_process:GO:0006013//mannose metabolic process;molecular_function:GO:0030246//carbohydrate binding;GO:0008270//zinc ion binding;GO:0004559//alpha-mannosidase activity;
	CL2033.Contig3_All	1.21215	1.81e-13	2.66e-12	Up	gi|91089793|ref|XP_968467.1|/0/PREDICTED: hexosaminidase D isoform X1 [Tribolium castaneum] &gt;gi|270013626|gb|EFA10074.1| hypothetical protein TcasGA2_TC012248 [Tribolium castaneum]	NA	sp|Q3U4H6|HEXDC_MOUSE/2e-87/Hexosaminidase D OS=Mus musculus GN=Hexdc PE=1 SV=1	tca:656874/0.0/hexosaminidase D; K14459 hexosaminidase [EC:3.2.1.52]	NA	PTHR21040/1.1E-222/--	biological_process:GO:0006355//regulation of transcription, DNA-templated;GO:0005975//carbohydrate metabolic process;molecular_function:GO:0004553//hydrolase activity, hydrolyzing O-glycosyl compounds;GO:0043565//sequence-specific DNA binding;GO:0003700//sequence-specific DNA binding transcription factor activity;
	Unigene8833_All	-1.48474	5.07e-16	8.72e-15	Down	gi|642929879|ref|XP_008196010.1|/0/PREDICTED: beta-hexosaminidase subunit alpha-like [Tribolium castaneum] &gt;gi|270010621|gb|EFA07069.1| hypothetical protein TcasGA2_TC010048 [Tribolium castaneum]	NA	sp|Q641X3|HEXA_RAT/3e-133/Beta-hexosaminidase subunit alpha OS=Rattus norvegicus GN=Hexa PE=2 SV=1	tca:664571/0.0/beta-hexosaminidase subunit alpha-like; K12373 hexosaminidase [EC:3.2.1.52]	CC0447/1e-46/---	PR00738/1.04E-66/Glycosyl hydrolase family 20 signature	biological_process:GO:0005975//carbohydrate metabolic process;molecular_function:GO:0004563//beta-N-acetylhexosaminidase activity;
	CL2033.Contig1_All	-1.27271	6.77e-17	1.23e-15	Down	gi|91089793|ref|XP_968467.1|/0/PREDICTED: hexosaminidase D isoform X1 [Tribolium castaneum] &gt;gi|270013626|gb|EFA10074.1| hypothetical protein TcasGA2_TC012248 [Tribolium castaneum]	NA	sp|Q3U4H6|HEXDC_MOUSE/2e-87/Hexosaminidase D OS=Mus musculus GN=Hexdc PE=1 SV=1	tca:656874/0.0/hexosaminidase D; K14459 hexosaminidase [EC:3.2.1.52]	NA	PTHR21040/7.6E-224/--	biological_process:GO:0006355//regulation of transcription, DNA-templated;GO:0005975//carbohydrate metabolic process;molecular_function:GO:0004553//hydrolase activity, hydrolyzing O-glycosyl compounds;GO:0043565//sequence-specific DNA binding;GO:0003700//sequence-specific DNA binding transcription factor activity;
	CL3367.Contig1_All	-1.22664	4.84e-61	3.2e-59	Down	gi|642928778|ref|XP_008195558.1|/0/PREDICTED: hexosaminidase 1 isoform X2 [Tribolium castaneum]	gi|149643018|ref|NM_001098848.1|/1e-165/Tribolium castaneum hexosaminidase 1 (Hexo1), mRNA >gi|148611475|gb|EF592536.1| Tribolium castaneum beta-N-acetylglucosaminidase NAG1 mRNA, complete cds	sp|P49010|HEXC_BOMMO/0.0/Chitooligosaccharidolytic beta-N-acetylglucosaminidase OS=Bombyx mori PE=1 SV=1	tca:659187/0.0/Hexo1, Nag1; hexosaminidase 1; K12373 hexosaminidase [EC:3.2.1.52]	XF0847/7e-26/---	PF14845/1.1E-17/beta-acetyl hexosaminidase like	biological_process:GO:0005975//carbohydrate metabolic process;molecular_function:GO:0004563//beta-N-acetylhexosaminidase activity;
	Unigene8604_All	-1.13219	9.31e-29	2.87e-27	Down	gi|642929876|ref|XP_008196008.1|/0/PREDICTED: beta-hexosaminidase subunit alpha-like [Tribolium castaneum]	NA	sp|Q5RC84|HEXA_PONAB/3e-132/Beta-hexosaminidase subunit alpha OS=Pongo abelii GN=HEXA PE=3 SV=1	tca:664567/0.0/beta-hexosaminidase subunit alpha-like; K12373 hexosaminidase [EC:3.2.1.52]	VC0613/1e-49/---	PR00738/7.0E-68/Glycosyl hydrolase family 20 signature	biological_process:GO:0005975//carbohydrate metabolic process;molecular_function:GO:0004563//beta-N-acetylhexosaminidase activity;
	CL1408.Contig2_All	2.0686	2.04e-05	0.000128	Up	gi|642931509|ref|XP_968544.2|/3.3775e-83/PREDICTED: enoyl-CoA hydratase domain-containing protein 3, mitochondrial [Tribolium castaneum] &gt;gi|642931511|ref|XP_008196616.1| PREDICTED: enoyl-CoA hydratase domain-containing protein 3, mitochondrial [Tribolium castaneum]	gi|332375639|gb|BT127999.1|/4e-07/Dendroctonus ponderosae clone DPO1114_K04 unknown mRNA	sp|Q96DC8|ECHD3_HUMAN/1e-61/Enoyl-CoA hydratase domain-containing protein 3, mitochondrial OS=Homo sapiens GN=ECHDC3 PE=1 SV=2	tsp:Tsp_04346/2e-32/exostosin-1; K02366 glucuronyl/N-acetylglucosaminyl transferase EXT1 [EC:2.4.1.224 2.4.1.225]	AF1641/6e-30/---	PF00378/1.7E-28/Enoyl-CoA hydratase/isomerase family	NA
transporting ATPase	CL1253.Contig1_All	1.94753	2.61e-17	4.84e-16	Up	gi|91085249|ref|XP_973267.1|/4.31141e-134/PREDICTED: thioredoxin-related transmembrane protein 2 homolog [Tribolium castaneum] &gt;gi|270009096|gb|EFA05544.1| hypothetical protein TcasGA2_TC015732 [Tribolium castaneum]	NA	sp|Q7JW12|TMX2_DROME/2e-81/Thioredoxin-related transmembrane protein 2 homolog OS=Drosophila melanogaster GN=CG11007 PE=2 SV=1	tca:662087/5e-87/protein DJ-1; K05687 protein DJ-1	ZthiJ/3e-30/---	PTHR15853/8.9E-94/--	biological_process:GO:0045454//cell redox homeostasis;
	CL2718.Contig4_All	-2.70133	2.07e-27	6.06e-26	Down	gi|118389804|ref|XP_001027947.1|/4.81483e-79/hypothetical protein TTHERM_00497590 [Tetrahymena thermophila] &gt;gi|89309717|gb|EAS07705.1| transmembrane protein, putative [Tetrahymena thermophila SB210]	NA	sp|Q54G14|Y0266_DICDI/2e-67/Uncharacterized protein DDB_G0290685 OS=Dictyostelium discoideum GN=DDB_G0290685 PE=2 SV=2	mze:101474573/1e-54/rpgr; retinitis pigmentosa GTPase regulator; K19607 X-linked retinitis pigmentosa GTPase regulator	YLR106c/2e-36/---	PF01223/4.0E-19/DNA/RNA non-specific endonuclease	NA
	Unigene10918_All	-1.3824	6.8e-21	1.53e-19	Down	gi|91082177|ref|XP_971147.1|/1.65625e-78/PREDICTED: transmembrane protein 35 [Tribolium castaneum] &gt;gi|270007236|gb|EFA03684.1| hypothetical protein TcasGA2_TC013786 [Tribolium castaneum]	NA	sp|Q4R5F4|TMM35_MACFA/4e-22/Transmembrane protein 35 OS=Macaca fascicularis GN=TMEM35 PE=2 SV=1	NA	NA	PF13564/5.5E-10/DoxX-like family	NA
	CL739.Contig4_All	-1.00515	1.5e-14	2.34e-13	Down	gi|642924455|ref|XP_008194305.1|/0/PREDICTED: uncharacterized transmembrane protein DDB_G0289901-like isoform X2 [Tribolium castaneum]	NA	sp|Q54GV8|Y8625_DICDI/8e-49/Uncharacterized transmembrane protein DDB_G0289901 OS=Dictyostelium discoideum GN=DDB_G0289901 PE=4 SV=1	pale:102885959/2e-32/FLG2; filaggrin family member 2; K10384 filaggrin	Rv0304c/4e-19/---	NA	NA
	CL2421.Contig1_All	2.65789	1.48e-12	2.04e-11	Up	gi|270008123|gb|EFA04571.1|/0/unc-5 [Tribolium castaneum]	NA	sp|Q8JGT4|UNC5B_XENLA/7e-88/Netrin receptor UNC5B OS=Xenopus laevis GN=unc5b PE=2 SV=1	tca:664175/0.0/netrin receptor UNC5C; K06784 roundabout, axon guidance receptor 4; K07521 netrin receptor unc-5; K16362 leucine-rich repeat transmembrane protein FLRT	NA	PTHR12582:SF9/1.0E-175/--	NA
	CL171.Contig1_All	1.34596	2.31e-10	2.66e-09	Up	gi|642934726|ref|XP_008197786.1|/2.27192e-35/PREDICTED: kelch repeat and BTB domain-containing protein 12 [Tribolium castaneum]	NA	NA	dwi:Dwil_GK21566/5e-08/GK21566 gene product from transcript GK21566-RA; K12387 lysosomal-associated transmembrane protein	NA	NA	NA
	CL171.Contig6_All	1.31192	4.82e-17	8.79e-16	Up	gi|642934726|ref|XP_008197786.1|/3.52296e-34/PREDICTED: kelch repeat and BTB domain-containing protein 12 [Tribolium castaneum]	NA	NA	dwi:Dwil_GK21566/8e-07/GK21566 gene product from transcript GK21566-RA; K12387 lysosomal-associated transmembrane protein	NA	NA	NA
	CL171.Contig7_All	-2.04386	5.26e-36	1.98e-34	Down	gi|642934726|ref|XP_008197786.1|/3.66601e-34/PREDICTED: kelch repeat and BTB domain-containing protein 12 [Tribolium castaneum]	NA	NA	dwi:Dwil_GK21566/8e-07/GK21566 gene product from transcript GK21566-RA; K12387 lysosomal-associated transmembrane protein	NA	NA	NA
	CL2421.Contig2_All	-1.29105	2.54e-10	2.9e-09	Down	gi|642924770|ref|XP_008194433.1|/0/PREDICTED: netrin receptor UNC5C isoform X1 [Tribolium castaneum]	gi|462363572|gb|APGK01028320.1|/1e-06/Dendroctonus ponderosae Seq01028330, whole genome shotgun sequence	sp|Q8JGT4|UNC5B_XENLA/8e-152/Netrin receptor UNC5B OS=Xenopus laevis GN=unc5b PE=2 SV=1	tca:664175/0.0/netrin receptor UNC5C; K06784 roundabout, axon guidance receptor 4; K07521 netrin receptor unc-5; K16362 leucine-rich repeat transmembrane protein FLRT	NA	SM00218/2.7E-21/Domain present in ZO-1 and Unc5-like netrin receptors	NA
	CL171.Contig5_All	-1.09968	9.91e-29	3.05e-27	Down	gi|642934726|ref|XP_008197786.1|/3.67487e-45/PREDICTED: kelch repeat and BTB domain-containing protein 12 [Tribolium castaneum]	NA	NA	dwi:Dwil_GK21566/4e-08/GK21566 gene product from transcript GK21566-RA; K12387 lysosomal-associated transmembrane protein	NA	NA	NA
	CL1153.Contig3_All	-1.01057	1.14e-09	1.22e-08	Down	gi|642934726|ref|XP_008197786.1|/0/PREDICTED: kelch repeat and BTB domain-containing protein 12 [Tribolium castaneum]	NA	sp|Q9Y573|IPP_HUMAN/6e-10/Actin-binding protein IPP OS=Homo sapiens GN=IPP PE=2 SV=1	der:Dere_GG10620/2e-45/GG10620 gene product from transcript GG10620-RA; K12387 lysosomal-associated transmembrane protein	NA	PTHR22667/9.4E-46/--	NA
	CL1023.Contig9_All	10.1163	1.67e-06	1.23e-05	Up	gi|642922536|ref|XP_008193216.1|/3.00916e-14/PREDICTED: probable multidrug resistance-associated protein lethal(2)03659 [Tribolium castaneum] &gt;gi|270007497|gb|EFA03945.1| hypothetical protein TcasGA2_TC014089 [Tribolium castaneum]	NA	NA	tca:656937/4e-15/probable multidrug resistance-associated protein lethal(2)03659; K05673 ATP-binding cassette, subfamily C (CFTR/MRP), member 4	NA	NA	biological_process:GO:0055085//transmembrane transport;GO:0006200//ATP catabolic process;cellular_component:GO:0016021//integral component of membrane;molecular_function:GO:0005524//ATP binding;GO:0042626//ATPase activity, coupled to transmembrane movement of substances;
	CL1023.Contig3_All	7.8009	3.2e-23	8.04e-22	Up	gi|642922536|ref|XP_008193216.1|/0/PREDICTED: probable multidrug resistance-associated protein lethal(2)03659 [Tribolium castaneum] &gt;gi|270007497|gb|EFA03945.1| hypothetical protein TcasGA2_TC014089 [Tribolium castaneum]	gi|146163521|ref|XM_001011660.2|/3e-07/Tetrahymena thermophila ABC transporter family protein, mRNA	sp|P91660|L259_DROME/0.0/Probable multidrug resistance-associated protein lethal(2)03659 OS=Drosophila melanogaster GN=l(2)03659 PE=2 SV=3	tca:656937/0.0/probable multidrug resistance-associated protein lethal(2)03659; K05673 ATP-binding cassette, subfamily C (CFTR/MRP), member 4	YDR135c/7e-169/---	PTHR24223/1.7E-254/--	biological_process:GO:0055085//transmembrane transport;GO:0006200//ATP catabolic process;cellular_component:GO:0016021//integral component of membrane;molecular_function:GO:0005524//ATP binding;GO:0042626//ATPase activity, coupled to transmembrane movement of substances;
	CL925.Contig2_All	7.49185	3.84e-17	7.04e-16	Up	gi|642935348|ref|XP_008197977.1|/0/PREDICTED: inactive pancreatic lipase-related protein 1 isoform X1 [Tribolium castaneum]	NA	sp|P54316|LIPR1_RAT/5e-64/Inactive pancreatic lipase-related protein 1 OS=Rattus norvegicus GN=Pnliprp1 PE=2 SV=1	tca:657437/2e-138/uncharacterized LOC657437; K03662 V-type H+-transporting ATPase S1 subunit	NA	PF00151/4.9E-78/Lipase	biological_process:GO:0006629//lipid metabolic process;cellular_component:GO:0005576//extracellular region;molecular_function:GO:0004806//triglyceride lipase activity;
	CL3004.Contig1_All	7.14975	3.36e-06	2.37e-05	Up	gi|91075962|ref|XP_969092.1|/2.25339e-147/PREDICTED: ATP-dependent DNA helicase Q1 [Tribolium castaneum] &gt;gi|270014620|gb|EFA11068.1| hypothetical protein TcasGA2_TC004664 [Tribolium castaneum]	gi|512887887|ref|XM_004921939.1|/8e-12/PREDICTED: Bombyx mori ATP-dependent DNA helicase Q1-like (LOC101746968), mRNA	sp|Q5RF63|RECQ1_PONAB/9e-96/ATP-dependent DNA helicase Q1 OS=Pongo abelii GN=RECQL PE=2 SV=1	tca:657544/4e-148/ATP-dependent DNA helicase Q1; K10899 ATP-dependent DNA helicase Q1 [EC:3.6.4.12]	SPAC2G11.12/2e-59/---	PTHR13710/6.4E-123/--	biological_process:GO:0006310//DNA recombination;molecular_function:GO:0005524//ATP binding;GO:0003676//nucleic acid binding;GO:0008026//ATP-dependent helicase activity;
	CL2262.Contig2_All	7.02237	2.5e-08	2.32e-07	Up	gi|642932460|ref|XP_008197124.1|/0/PREDICTED: LOW QUALITY PROTEIN: diacylglycerol kinase epsilon [Tribolium castaneum]	gi|383858011|ref|XM_003704449.1|/1e-08/PREDICTED: Megachile rotundata diacylglycerol kinase epsilon-like (LOC100876950), mRNA	sp|Q9R1C6|DGKE_MOUSE/2e-115/Diacylglycerol kinase epsilon OS=Mus musculus GN=Dgke PE=2 SV=1	tca:661694/0.0/diacylglycerol kinase epsilon; K00901 diacylglycerol kinase (ATP) [EC:2.7.1.107]	NA	SM00109/6.0E-6/Protein kinase C conserved region 1 (C1) domains (Cysteine-rich domains)	NA
	CL925.Contig1_All	5.72792	1.36e-05	8.77e-05	Up	gi|642935348|ref|XP_008197977.1|/0/PREDICTED: inactive pancreatic lipase-related protein 1 isoform X1 [Tribolium castaneum]	NA	sp|Q6P8U6|LIPP_MOUSE/8e-59/Pancreatic triacylglycerol lipase OS=Mus musculus GN=Pnlip PE=1 SV=1	tca:657437/2e-138/uncharacterized LOC657437; K03662 V-type H+-transporting ATPase S1 subunit	NA	PTHR12471/1.9E-22/--	biological_process:GO:0006629//lipid metabolic process;cellular_component:GO:0005576//extracellular region;molecular_function:GO:0004806//triglyceride lipase activity;
	CL608.Contig2_All	4.45438	3.12e-14	4.79e-13	Up	gi|270002220|gb|EEZ98667.1|/0/hypothetical protein TcasGA2_TC001199 [Tribolium castaneum]	NA	sp|F1NHE9|KCJ12_CHICK/1e-96/ATP-sensitive inward rectifier potassium channel 12 OS=Gallus gallus GN=KCNJ12 PE=1 SV=1	tca:654910/7e-167/ATP-sensitive inward rectifier potassium channel 12; K05330 potassium inwardly-rectifying channel subfamily J, other	NA	PR01320/1.0E-54/Inward rectifier K+ channel superfamily signature	NA
	Unigene2937_All	3.10613	2.08e-13	3.02e-12	Up	gi|642922536|ref|XP_008193216.1|/2.03389e-35/PREDICTED: probable multidrug resistance-associated protein lethal(2)03659 [Tribolium castaneum] &gt;gi|270007497|gb|EFA03945.1| hypothetical protein TcasGA2_TC014089 [Tribolium castaneum]	NA	sp|Q2IBB3|CFTR_RHIFE/3e-10/Cystic fibrosis transmembrane conductance regulator OS=Rhinolophus ferrumequinum GN=CFTR PE=3 SV=1	tca:656937/4e-36/probable multidrug resistance-associated protein lethal(2)03659; K05673 ATP-binding cassette, subfamily C (CFTR/MRP), member 4	YDR135c/2e-08/---	PTHR24223/9.8E-20/--	biological_process:GO:0006810//transport;GO:0009987//cellular process;molecular_function:GO:0000166//nucleotide binding;GO:0016887//ATPase activity;
	CL1023.Contig4_All	3.00445	2.31e-39	9.73e-38	Up	gi|642922536|ref|XP_008193216.1|/0/PREDICTED: probable multidrug resistance-associated protein lethal(2)03659 [Tribolium castaneum] &gt;gi|270007497|gb|EFA03945.1| hypothetical protein TcasGA2_TC014089 [Tribolium castaneum]	gi|146163521|ref|XM_001011660.2|/3e-07/Tetrahymena thermophila ABC transporter family protein, mRNA	sp|P91660|L259_DROME/0.0/Probable multidrug resistance-associated protein lethal(2)03659 OS=Drosophila melanogaster GN=l(2)03659 PE=2 SV=3	tca:656937/0.0/probable multidrug resistance-associated protein lethal(2)03659; K05673 ATP-binding cassette, subfamily C (CFTR/MRP), member 4	YDR135c/2e-165/---	PTHR24223/1.7E-254/--	biological_process:GO:0055085//transmembrane transport;GO:0006200//ATP catabolic process;cellular_component:GO:0016021//integral component of membrane;molecular_function:GO:0005524//ATP binding;GO:0042626//ATPase activity, coupled to transmembrane movement of substances;
	CL608.Contig3_All	2.82517	1.2e-13	1.78e-12	Up	gi|642914425|ref|XP_008201491.1|/0/PREDICTED: ATP-sensitive inward rectifier potassium channel 12 [Tribolium castaneum]	NA	sp|F1NHE9|KCJ12_CHICK/4e-97/ATP-sensitive inward rectifier potassium channel 12 OS=Gallus gallus GN=KCNJ12 PE=1 SV=1	tca:654910/0.0/ATP-sensitive inward rectifier potassium channel 12; K05330 potassium inwardly-rectifying channel subfamily J, other	NA	PTHR11767:SF45/6.3E-218/--	NA
	Unigene1171_All	2.63178	4.35e-26	1.22e-24	Up	gi|642922530|ref|XP_008193213.1|/0/PREDICTED: probable multidrug resistance-associated protein lethal(2)03659 [Tribolium castaneum] &gt;gi|642922532|ref|XP_008193214.1| PREDICTED: probable multidrug resistance-associated protein lethal(2)03659 [Tribolium castaneum] &gt;gi|642922534|ref|XP_008193215.1| PREDICTED: probable multidrug resistance-associated protein lethal(2)03659 [Tribolium castaneum]	gi|380015806|ref|XM_003691838.1|/2e-11/PREDICTED: Apis florea multidrug resistance-associated protein 4-like (LOC100866883), mRNA	sp|P91660|L259_DROME/0.0/Probable multidrug resistance-associated protein lethal(2)03659 OS=Drosophila melanogaster GN=l(2)03659 PE=2 SV=3	tca:657021/0.0/probable multidrug resistance-associated protein lethal(2)03659; K05673 ATP-binding cassette, subfamily C (CFTR/MRP), member 4	SPBC359.05/2e-134/---	PF00664/5.7E-20/ABC transporter transmembrane region	biological_process:GO:0006810//transport;GO:0009987//cellular process;molecular_function:GO:0000166//nucleotide binding;GO:0016887//ATPase activity;
	CL1930.Contig1_All	2.62352	7.9e-08	6.93e-07	Up	gi|642919697|ref|XP_008192026.1|/1.26389e-51/PREDICTED: putative ATP-dependent RNA helicase DHX57 [Tribolium castaneum] &gt;gi|270005433|gb|EFA01881.1| hypothetical protein TcasGA2_TC007486 [Tribolium castaneum]	NA	NA	aag:AaeL_AAEL013182/2e-15/AAEL013182-PA; K13026 ATP-dependent RNA helicase DHX57 [EC:3.6.4.13]	NA	NA	molecular_function:GO:0005524//ATP binding;GO:0008270//zinc ion binding;GO:0003676//nucleic acid binding;GO:0008026//ATP-dependent helicase activity;
	Unigene1170_All	2.44222	4.28e-46	2.1e-44	Up	gi|642922530|ref|XP_008193213.1|/0/PREDICTED: probable multidrug resistance-associated protein lethal(2)03659 [Tribolium castaneum] &gt;gi|642922532|ref|XP_008193214.1| PREDICTED: probable multidrug resistance-associated protein lethal(2)03659 [Tribolium castaneum] &gt;gi|642922534|ref|XP_008193215.1| PREDICTED: probable multidrug resistance-associated protein lethal(2)03659 [Tribolium castaneum]	gi|380015806|ref|XM_003691838.1|/2e-11/PREDICTED: Apis florea multidrug resistance-associated protein 4-like (LOC100866883), mRNA	sp|P91660|L259_DROME/0.0/Probable multidrug resistance-associated protein lethal(2)03659 OS=Drosophila melanogaster GN=l(2)03659 PE=2 SV=3	tca:657021/0.0/probable multidrug resistance-associated protein lethal(2)03659; K05673 ATP-binding cassette, subfamily C (CFTR/MRP), member 4	YDR135c/7e-146/---	PS50929/24.99/ABC transporter integral membrane type-1 fused domain profile.	biological_process:GO:0055085//transmembrane transport;GO:0006200//ATP catabolic process;cellular_component:GO:0016021//integral component of membrane;molecular_function:GO:0005524//ATP binding;GO:0042626//ATPase activity, coupled to transmembrane movement of substances;
	CL3751.Contig1_All	2.3322	5.66e-05	0.000326	Up	gi|642934400|ref|XP_008197643.1|/4.14733e-16/PREDICTED: micronuclear linker histone polyprotein-like isoform X2 [Tribolium castaneum]	NA	NA	tca:657737/6e-07/ATP synthase-coupling factor 6, mitochondrial; K02131 F-type H+-transporting ATPase subunit 6	NA	NA	NA
	CL1023.Contig5_All	2.04142	2.27e-33	8.02e-32	Up	gi|642922536|ref|XP_008193216.1|/0/PREDICTED: probable multidrug resistance-associated protein lethal(2)03659 [Tribolium castaneum] &gt;gi|270007497|gb|EFA03945.1| hypothetical protein TcasGA2_TC014089 [Tribolium castaneum]	gi|146163521|ref|XM_001011660.2|/3e-07/Tetrahymena thermophila ABC transporter family protein, mRNA	sp|P91660|L259_DROME/0.0/Probable multidrug resistance-associated protein lethal(2)03659 OS=Drosophila melanogaster GN=l(2)03659 PE=2 SV=3	tca:656937/0.0/probable multidrug resistance-associated protein lethal(2)03659; K05673 ATP-binding cassette, subfamily C (CFTR/MRP), member 4	YDR135c/7e-173/---	PS50929/22.1/ABC transporter integral membrane type-1 fused domain profile.	biological_process:GO:0055085//transmembrane transport;GO:0006200//ATP catabolic process;cellular_component:GO:0016021//integral component of membrane;molecular_function:GO:0005524//ATP binding;GO:0042626//ATPase activity, coupled to transmembrane movement of substances;
	CL1053.Contig2_All	1.97863	5.75e-05	0.000331	Up	gi|642910986|ref|XP_008193496.1|/0/PREDICTED: protein scarlet-like [Tribolium castaneum]	NA	sp|P45843|SCRT_DROME/9e-71/Protein scarlet OS=Drosophila melanogaster GN=st PE=1 SV=3	ngi:103743377/1e-54/Abcg2; ATP-binding cassette, sub-family G (WHITE), member 2; K05681 ATP-binding cassette, subfamily G (WHITE), member 2	ECU03g0390_1/7e-40/---	PS00211/-/ABC transporters family signature.	NA
	CL2262.Contig1_All	1.82227	1.87e-08	1.76e-07	Up	gi|642932460|ref|XP_008197124.1|/0/PREDICTED: LOW QUALITY PROTEIN: diacylglycerol kinase epsilon [Tribolium castaneum]	gi|383858011|ref|XM_003704449.1|/1e-08/PREDICTED: Megachile rotundata diacylglycerol kinase epsilon-like (LOC100876950), mRNA	sp|Q9R1C6|DGKE_MOUSE/2e-115/Diacylglycerol kinase epsilon OS=Mus musculus GN=Dgke PE=2 SV=1	tca:661694/0.0/diacylglycerol kinase epsilon; K00901 diacylglycerol kinase (ATP) [EC:2.7.1.107]	NA	PS00479/-/Zinc finger phorbol-ester/DAG-type signature.	NA
	CL925.Contig4_All	1.6477	3.58e-06	2.51e-05	Up	gi|642935348|ref|XP_008197977.1|/0/PREDICTED: inactive pancreatic lipase-related protein 1 isoform X1 [Tribolium castaneum]	NA	sp|Q6P8U6|LIPP_MOUSE/8e-59/Pancreatic triacylglycerol lipase OS=Mus musculus GN=Pnlip PE=1 SV=1	tca:657437/2e-138/uncharacterized LOC657437; K03662 V-type H+-transporting ATPase S1 subunit	NA	PTHR12471/1.9E-22/--	biological_process:GO:0006629//lipid metabolic process;cellular_component:GO:0005576//extracellular region;molecular_function:GO:0004806//triglyceride lipase activity;
	CL925.Contig8_All	1.64147	3.51e-20	7.67e-19	Up	gi|91090488|ref|XP_968919.1|/0/PREDICTED: inactive pancreatic lipase-related protein 1 isoform X2 [Tribolium castaneum] &gt;gi|270013864|gb|EFA10312.1| hypothetical protein TcasGA2_TC012528 [Tribolium castaneum]	NA	sp|Q6P8U6|LIPP_MOUSE/4e-59/Pancreatic triacylglycerol lipase OS=Mus musculus GN=Pnlip PE=1 SV=1	tca:657437/2e-138/uncharacterized LOC657437; K03662 V-type H+-transporting ATPase S1 subunit	NA	PF00151/8.8E-70/Lipase	biological_process:GO:0006629//lipid metabolic process;cellular_component:GO:0005576//extracellular region;molecular_function:GO:0004806//triglyceride lipase activity;
	CL925.Contig10_All	1.59525	8.54e-06	5.67e-05	Up	gi|642935348|ref|XP_008197977.1|/5.88793e-58/PREDICTED: inactive pancreatic lipase-related protein 1 isoform X1 [Tribolium castaneum]	NA	NA	tca:657437/3e-26/uncharacterized LOC657437; K03662 V-type H+-transporting ATPase S1 subunit	NA	PTHR11610:SF83/4.9E-21/--	biological_process:GO:0006629//lipid metabolic process;cellular_component:GO:0005576//extracellular region;molecular_function:GO:0004806//triglyceride lipase activity;
	CL4121.Contig2_All	1.52655	5.01e-12	6.6e-11	Up	gi|642928090|ref|XP_008200152.1|/0/PREDICTED: ATP-dependent RNA helicase DDX24 [Tribolium castaneum]	gi|380015022|ref|XM_003691463.1|/1e-06/PREDICTED: Apis florea ATP-dependent RNA helicase DDX24-like (LOC100865940), mRNA	sp|Q9GZR7|DDX24_HUMAN/3e-118/ATP-dependent RNA helicase DDX24 OS=Homo sapiens GN=DDX24 PE=1 SV=1	tca:657845/0.0/ATP-dependent RNA helicase DDX24; K14805 ATP-dependent RNA helicase DDX24/MAK5 [EC:3.6.4.13]	YBR142w/2e-80/---	PF00270/9.6E-39/DEAD/DEAH box helicase	NA
	CL57.Contig1_All	1.38676	2.95e-07	2.41e-06	Up	gi|642926777|ref|XP_008195010.1|/0/PREDICTED: copper-transporting ATPase 1 isoform X7 [Tribolium castaneum]	gi|380014297|ref|XM_003691128.1|/2e-22/PREDICTED: Apis florea copper-transporting ATPase 1-like (LOC100867919), mRNA	sp|P70705|ATP7A_RAT/2e-175/Copper-transporting ATPase 1 OS=Rattus norvegicus GN=Atp7a PE=1 SV=1	tca:656862/0.0/copper-transporting ATPase 1; K17686 Cu+-exporting ATPase [EC:3.6.3.54]	alr1627/4e-106/---	PF00122/6.1E-32/E1-E2 ATPase	NA
	CL925.Contig7_All	1.29498	6.48e-43	2.96e-41	Up	gi|91090488|ref|XP_968919.1|/0/PREDICTED: inactive pancreatic lipase-related protein 1 isoform X2 [Tribolium castaneum] &gt;gi|270013864|gb|EFA10312.1| hypothetical protein TcasGA2_TC012528 [Tribolium castaneum]	NA	sp|P54316|LIPR1_RAT/2e-64/Inactive pancreatic lipase-related protein 1 OS=Rattus norvegicus GN=Pnliprp1 PE=2 SV=1	tca:657437/2e-138/uncharacterized LOC657437; K03662 V-type H+-transporting ATPase S1 subunit	NA	PTHR11610/2.2E-181/--	biological_process:GO:0006629//lipid metabolic process;cellular_component:GO:0005576//extracellular region;molecular_function:GO:0004806//triglyceride lipase activity;
	CL4124.Contig2_All	1.25867	2.85e-23	7.18e-22	Up	gi|642918664|ref|XP_008191529.1|/7.81645e-109/PREDICTED: 26S proteasome non-ATPase regulatory subunit 10-like isoform X1 [Tribolium castaneum] &gt;gi|270005658|gb|EFA02106.1| hypothetical protein TcasGA2_TC007750 [Tribolium castaneum]	NA	sp|Q9Z2X3|PSD10_RAT/7e-37/26S proteasome non-ATPase regulatory subunit 10 OS=Rattus norvegicus GN=Psmd10 PE=2 SV=1	tca:103312517/1e-109/26S proteasome non-ATPase regulatory subunit 10-like; K06694 26S proteasome non-ATPase regulatory subunit 10	SPAC6C3.08/2e-21/---	PS50088/12.556/Ankyrin repeat profile.	NA
	CL2292.Contig1_All	1.17439	6.06e-73	4.85e-71	Up	gi|642926018|ref|XP_008194731.1|/0/PREDICTED: ATP-citrate synthase isoform X2 [Tribolium castaneum] &gt;gi|270008566|gb|EFA05014.1| hypothetical protein TcasGA2_TC015096 [Tribolium castaneum]	gi|237874158|ref|NM_001160380.1|/3e-29/Acyrthosiphon pisum ATP citrate lyase (Atpcl), mRNA	sp|Q2TCH3|ACLY_SHEEP/0.0/ATP-citrate synthase OS=Ovis aries GN=ACLY PE=2 SV=1	tca:656728/0.0/ATP-citrate synthase; K01648 ATP citrate (pro-S)-lyase [EC:2.3.3.8]	SPBC1703.07_1/1e-143/---	PF08442/2.5E-9/ATP-grasp domain	biological_process:GO:0044262//cellular carbohydrate metabolic process;cellular_component:GO:0005737//cytoplasm;molecular_function:GO:0004775//succinate-CoA ligase (ADP-forming) activity;GO:0003878//ATP citrate synthase activity;GO:0005524//ATP binding;GO:0048037//cofactor binding;
	CL925.Contig5_All	1.12575	7.68e-10	8.37e-09	Up	gi|642935348|ref|XP_008197977.1|/0/PREDICTED: inactive pancreatic lipase-related protein 1 isoform X1 [Tribolium castaneum]	NA	sp|P54316|LIPR1_RAT/3e-64/Inactive pancreatic lipase-related protein 1 OS=Rattus norvegicus GN=Pnliprp1 PE=2 SV=1	tca:657437/2e-138/uncharacterized LOC657437; K03662 V-type H+-transporting ATPase S1 subunit	NA	PTHR11610/3.3E-182/--	biological_process:GO:0006629//lipid metabolic process;cellular_component:GO:0005576//extracellular region;molecular_function:GO:0004806//triglyceride lipase activity;
	CL1023.Contig2_All	1.0657	1.69e-09	1.77e-08	Up	gi|642922536|ref|XP_008193216.1|/0/PREDICTED: probable multidrug resistance-associated protein lethal(2)03659 [Tribolium castaneum] &gt;gi|270007497|gb|EFA03945.1| hypothetical protein TcasGA2_TC014089 [Tribolium castaneum]	gi|146163521|ref|XM_001011660.2|/3e-07/Tetrahymena thermophila ABC transporter family protein, mRNA	sp|P91660|L259_DROME/0.0/Probable multidrug resistance-associated protein lethal(2)03659 OS=Drosophila melanogaster GN=l(2)03659 PE=2 SV=3	tca:656937/0.0/probable multidrug resistance-associated protein lethal(2)03659; K05673 ATP-binding cassette, subfamily C (CFTR/MRP), member 4	YHL035c/3e-147/---	PS50929/22.1/ABC transporter integral membrane type-1 fused domain profile.	biological_process:GO:0055085//transmembrane transport;GO:0006200//ATP catabolic process;cellular_component:GO:0016021//integral component of membrane;molecular_function:GO:0005524//ATP binding;GO:0042626//ATPase activity, coupled to transmembrane movement of substances;
	CL2555.Contig2_All	1.00326	9.74e-17	1.74e-15	Up	gi|642921170|ref|XP_008192744.1|/0/PREDICTED: ATP-binding cassette sub-family B member 10, mitochondrial isoform X1 [Tribolium castaneum]	gi|330794686|ref|XM_003285361.1|/2e-08/Dictyostelium purpureum ABC transporter B family protein (ABCB2), mRNA	sp|Q9JI39|ABCBA_MOUSE/3e-178/ATP-binding cassette sub-family B member 10, mitochondrial OS=Mus musculus GN=Abcb10 PE=2 SV=1	tca:655121/0.0/ATP-binding cassette sub-family B member 10, mitochondrial; K05657 ATP-binding cassette, subfamily B (MDR/TAP), member 10	SPBC9B6.09c/7e-129/---	PTHR24221/1.3E-292/--	biological_process:GO:0055085//transmembrane transport;GO:0006200//ATP catabolic process;cellular_component:GO:0016021//integral component of membrane;molecular_function:GO:0005524//ATP binding;GO:0042626//ATPase activity, coupled to transmembrane movement of substances;
	CL2292.Contig2_All	-13.0487	0	0	Down	gi|642926018|ref|XP_008194731.1|/0/PREDICTED: ATP-citrate synthase isoform X2 [Tribolium castaneum] &gt;gi|270008566|gb|EFA05014.1| hypothetical protein TcasGA2_TC015096 [Tribolium castaneum]	gi|237874158|ref|NM_001160380.1|/3e-29/Acyrthosiphon pisum ATP citrate lyase (Atpcl), mRNA	sp|Q2TCH3|ACLY_SHEEP/0.0/ATP-citrate synthase OS=Ovis aries GN=ACLY PE=2 SV=1	tca:656728/0.0/ATP-citrate synthase; K01648 ATP citrate (pro-S)-lyase [EC:2.3.3.8]	SPBC1703.07_1/1e-143/---	PF00285/1.7E-19/Citrate synthase	biological_process:GO:0044262//cellular carbohydrate metabolic process;cellular_component:GO:0005737//cytoplasm;molecular_function:GO:0004775//succinate-CoA ligase (ADP-forming) activity;GO:0003878//ATP citrate synthase activity;GO:0005524//ATP binding;GO:0048037//cofactor binding;
	CL608.Contig1_All	-8.96578	9.51e-29	2.93e-27	Down	gi|642914425|ref|XP_008201491.1|/0/PREDICTED: ATP-sensitive inward rectifier potassium channel 12 [Tribolium castaneum]	NA	sp|F1NHE9|KCJ12_CHICK/6e-97/ATP-sensitive inward rectifier potassium channel 12 OS=Gallus gallus GN=KCNJ12 PE=1 SV=1	tca:654910/0.0/ATP-sensitive inward rectifier potassium channel 12; K05330 potassium inwardly-rectifying channel subfamily J, other	NA	PF01007/3.1E-142/Inward rectifier potassium channel	NA
	CL925.Contig9_All	-7.45533	1.78e-08	1.68e-07	Down	gi|642935348|ref|XP_008197977.1|/3.3322e-63/PREDICTED: inactive pancreatic lipase-related protein 1 isoform X1 [Tribolium castaneum]	NA	NA	tca:657437/3e-26/uncharacterized LOC657437; K03662 V-type H+-transporting ATPase S1 subunit	NA	PTHR11610/2.1E-23/--	biological_process:GO:0006629//lipid metabolic process;cellular_component:GO:0005576//extracellular region;molecular_function:GO:0004806//triglyceride lipase activity;
	CL3004.Contig2_All	-7	7.04e-08	6.21e-07	Down	gi|91075962|ref|XP_969092.1|/0/PREDICTED: ATP-dependent DNA helicase Q1 [Tribolium castaneum] &gt;gi|270014620|gb|EFA11068.1| hypothetical protein TcasGA2_TC004664 [Tribolium castaneum]	gi|512887887|ref|XM_004921939.1|/1e-11/PREDICTED: Bombyx mori ATP-dependent DNA helicase Q1-like (LOC101746968), mRNA	sp|P46063|RECQ1_HUMAN/9e-146/ATP-dependent DNA helicase Q1 OS=Homo sapiens GN=RECQL PE=1 SV=3	tca:657544/0.0/ATP-dependent DNA helicase Q1; K10899 ATP-dependent DNA helicase Q1 [EC:3.6.4.12]	SPAC2G11.12/4e-97/---	PF00271/8.3E-18/Helicase conserved C-terminal domain	biological_process:GO:0006310//DNA recombination;molecular_function:GO:0005524//ATP binding;GO:0003676//nucleic acid binding;GO:0008026//ATP-dependent helicase activity;
	CL925.Contig6_All	-3.64284	8.74e-45	4.14e-43	Down	gi|91090488|ref|XP_968919.1|/0/PREDICTED: inactive pancreatic lipase-related protein 1 isoform X2 [Tribolium castaneum] &gt;gi|270013864|gb|EFA10312.1| hypothetical protein TcasGA2_TC012528 [Tribolium castaneum]	NA	sp|P54316|LIPR1_RAT/3e-64/Inactive pancreatic lipase-related protein 1 OS=Rattus norvegicus GN=Pnliprp1 PE=2 SV=1	tca:657437/2e-138/uncharacterized LOC657437; K03662 V-type H+-transporting ATPase S1 subunit	NA	PR00823/1.1E-8/Pancreatic lipase signature	biological_process:GO:0006629//lipid metabolic process;cellular_component:GO:0005576//extracellular region;molecular_function:GO:0004806//triglyceride lipase activity;
	CL925.Contig3_All	-3.05889	1.7e-09	1.78e-08	Down	gi|91090488|ref|XP_968919.1|/0/PREDICTED: inactive pancreatic lipase-related protein 1 isoform X2 [Tribolium castaneum] &gt;gi|270013864|gb|EFA10312.1| hypothetical protein TcasGA2_TC012528 [Tribolium castaneum]	NA	sp|Q6P8U6|LIPP_MOUSE/4e-59/Pancreatic triacylglycerol lipase OS=Mus musculus GN=Pnlip PE=1 SV=1	tca:657437/2e-138/uncharacterized LOC657437; K03662 V-type H+-transporting ATPase S1 subunit	NA	PF00151/8.8E-70/Lipase	biological_process:GO:0006629//lipid metabolic process;cellular_component:GO:0005576//extracellular region;molecular_function:GO:0004806//triglyceride lipase activity;
	CL3802.Contig2_All	-2.98489	8.5e-24	2.2e-22	Down	gi|642926997|ref|XP_008195097.1|/0/PREDICTED: mitotic spindle assembly checkpoint protein MAD1 [Tribolium castaneum] &gt;gi|270010044|gb|EFA06492.1| hypothetical protein TcasGA2_TC009389 [Tribolium castaneum]	NA	sp|Q9WTX8|MD1L1_MOUSE/2e-60/Mitotic spindle assembly checkpoint protein MAD1 OS=Mus musculus GN=Mad1l1 PE=2 SV=1	tca:656951/0.0/mitotic spindle assembly checkpoint protein MAD1; K13181 ATP-dependent RNA helicase DDX27 [EC:3.6.4.13]	YHR023w/8e-18/---	PTHR23168/3.0E-91/--	biological_process:GO:0007094//mitotic spindle assembly checkpoint;
	CL361.Contig6_All	-2.17509	5.04e-05	0.000294	Down	gi|642938587|ref|XP_008199853.1|/0/PREDICTED: plasma membrane calcium-transporting ATPase 2 isoform X2 [Tribolium castaneum]	gi|498985551|ref|XM_004530576.1|/2e-66/PREDICTED: Ceratitis capitata plasma membrane calcium-transporting ATPase 3-like (LOC101455930), transcript variant X9, mRNA	sp|Q16720|AT2B3_HUMAN/0.0/Plasma membrane calcium-transporting ATPase 3 OS=Homo sapiens GN=ATP2B3 PE=1 SV=3	tca:656486/0.0/plasma membrane calcium-transporting ATPase 1; K05850 Ca2+ transporting ATPase, plasma membrane [EC:3.6.3.8]	CAC2137/2e-64/---	PF00702/1.0E-23/haloacid dehalogenase-like hydrolase	biological_process:GO:0070588//calcium ion transmembrane transport;cellular_component:GO:0016021//integral component of membrane;molecular_function:GO:0046872//metal ion binding;GO:0005524//ATP binding;GO:0005388//calcium-transporting ATPase activity;
	Unigene15264_All	-2.00414	2.22e-07	1.84e-06	Down	gi|345492363|ref|XP_001600422.2|/9.14484e-27/PREDICTED: uncharacterized protein LOC100115799 [Nasonia vitripennis]	NA	sp|O15394|NCAM2_HUMAN/2e-06/Neural cell adhesion molecule 2 OS=Homo sapiens GN=NCAM2 PE=1 SV=2	pxy:105397556/2e-07/uncharacterized LOC105397556; K17675 ATP-dependent RNA helicase SUPV3L1/SUV3 [EC:3.6.4.13]	NA	PS50835/8.484/Ig-like domain profile.	NA
	CL361.Contig3_All	-1.97884	1.02e-38	4.17e-37	Down	gi|642938589|ref|XP_008199854.1|/0/PREDICTED: plasma membrane calcium-transporting ATPase 2 isoform X3 [Tribolium castaneum]	gi|498985551|ref|XM_004530576.1|/7e-66/PREDICTED: Ceratitis capitata plasma membrane calcium-transporting ATPase 3-like (LOC101455930), transcript variant X9, mRNA	sp|Q16720|AT2B3_HUMAN/0.0/Plasma membrane calcium-transporting ATPase 3 OS=Homo sapiens GN=ATP2B3 PE=1 SV=3	tca:656486/0.0/plasma membrane calcium-transporting ATPase 1; K05850 Ca2+ transporting ATPase, plasma membrane [EC:3.6.3.8]	mll5286/0.0/---	PF12424/3.5E-5/Plasma membrane calcium transporter ATPase C terminal	biological_process:GO:0070588//calcium ion transmembrane transport;cellular_component:GO:0016021//integral component of membrane;molecular_function:GO:0046872//metal ion binding;GO:0005524//ATP binding;GO:0005388//calcium-transporting ATPase activity;
	CL2197.Contig4_All	-1.84868	1.19e-29	3.79e-28	Down	gi|642926988|ref|XP_008195092.1|/0/PREDICTED: uncharacterized protein LOC656611 [Tribolium castaneum] &gt;gi|642926990|ref|XP_008195093.1| PREDICTED: uncharacterized protein LOC656611 [Tribolium castaneum]	gi|462289669|gb|APGK01054732.1|/3e-18/Dendroctonus ponderosae Seq01054742, whole genome shotgun sequence	sp|A1A4H6|DDX27_BOVIN/0.0/Probable ATP-dependent RNA helicase DDX27 OS=Bos taurus GN=DDX27 PE=2 SV=1	tca:103313489/0.0/probable ATP-dependent RNA helicase DDX27; K13181 ATP-dependent RNA helicase DDX27 [EC:3.6.4.13]	SPAC30D11.03/2e-125/---	PTHR15690:SF0/5.2E-35/--	molecular_function:GO:0005524//ATP binding;GO:0008026//ATP-dependent helicase activity;GO:0003676//nucleic acid binding;
	CL423.Contig1_All	-1.80506	7.46e-05	0.000421	Down	gi|270011001|gb|EFA07449.1|/6.78456e-19/hypothetical protein TcasGA2_TC009033 [Tribolium castaneum]	NA	sp|Q00361|ATP5I_BOVIN/3e-07/ATP synthase subunit e, mitochondrial OS=Bos taurus GN=ATP5I PE=1 SV=2	tca:657625/1e-16/ATP synthase subunit e, mitochondrial; K02129 F-type H+-transporting ATPase subunit e	NA	PTHR12427:SF0/2.8E-14/--	NA
	CL684.Contig6_All	-1.533	4.46e-21	1.02e-19	Down	gi|642935087|ref|XP_008197879.1|/0/PREDICTED: protein scarlet isoform X1 [Tribolium castaneum]	NA	sp|P45843|SCRT_DROME/0.0/Protein scarlet OS=Drosophila melanogaster GN=st PE=1 SV=3	asn:102384551/5e-76/ABCG1; ATP-binding cassette, sub-family G (WHITE), member 1; K05679 ATP-binding cassette, subfamily G (WHITE), member 1	ECU03g0390_1/1e-43/---	PF01061/3.8E-31/ABC-2 type transporter	NA
	CL2292.Contig3_All	-1.51561	1.6e-23	4.1e-22	Down	gi|642926014|ref|XP_008194728.1|/0/PREDICTED: ATP-citrate synthase isoform X1 [Tribolium castaneum] &gt;gi|642926016|ref|XP_008194729.1| PREDICTED: ATP-citrate synthase isoform X1 [Tribolium castaneum]	gi|237874158|ref|NM_001160380.1|/3e-29/Acyrthosiphon pisum ATP citrate lyase (Atpcl), mRNA	sp|P53396|ACLY_HUMAN/0.0/ATP-citrate synthase OS=Homo sapiens GN=ACLY PE=1 SV=3	tca:656728/0.0/ATP-citrate synthase; K01648 ATP citrate (pro-S)-lyase [EC:2.3.3.8]	SPBC1703.07_1/1e-143/---	PF08442/2.6E-9/ATP-grasp domain	biological_process:GO:0044262//cellular carbohydrate metabolic process;cellular_component:GO:0005737//cytoplasm;molecular_function:GO:0004775//succinate-CoA ligase (ADP-forming) activity;GO:0003878//ATP citrate synthase activity;GO:0005524//ATP binding;GO:0048037//cofactor binding;
	CL684.Contig5_All	-1.39523	0.000163	0.000863	Down	gi|642935087|ref|XP_008197879.1|/0/PREDICTED: protein scarlet isoform X1 [Tribolium castaneum]	NA	sp|P45843|SCRT_DROME/5e-101/Protein scarlet OS=Drosophila melanogaster GN=st PE=1 SV=3	tru:101076979/3e-27/abcg2; ATP-binding cassette, sub-family G (WHITE), member 2 (Junior blood group); K05681 ATP-binding cassette, subfamily G (WHITE), member 2	YCR011c_3/4e-15/---	PF01061/1.1E-31/ABC-2 type transporter	NA
	CL684.Contig3_All	-1.24415	2.85e-21	6.56e-20	Down	gi|642935087|ref|XP_008197879.1|/0/PREDICTED: protein scarlet isoform X1 [Tribolium castaneum]	NA	sp|P45843|SCRT_DROME/0.0/Protein scarlet OS=Drosophila melanogaster GN=st PE=1 SV=3	asn:102384551/5e-76/ABCG1; ATP-binding cassette, sub-family G (WHITE), member 1; K05679 ATP-binding cassette, subfamily G (WHITE), member 1	ECU03g0390_1/1e-43/---	PF00005/2.6E-22/ABC transporter	NA
	CL684.Contig2_All	-1.20014	4.33e-10	4.86e-09	Down	gi|642935087|ref|XP_008197879.1|/0/PREDICTED: protein scarlet isoform X1 [Tribolium castaneum]	NA	sp|P45843|SCRT_DROME/0.0/Protein scarlet OS=Drosophila melanogaster GN=st PE=1 SV=3	asn:102384551/5e-76/ABCG1; ATP-binding cassette, sub-family G (WHITE), member 1; K05679 ATP-binding cassette, subfamily G (WHITE), member 1	ECU03g0390_1/1e-43/---	PTHR19241/7.1E-209/--	NA
	CL361.Contig5_All	-1.19574	2.65e-42	1.2e-40	Down	gi|642938577|ref|XP_008199848.1|/0/PREDICTED: plasma membrane calcium-transporting ATPase 2 isoform X1 [Tribolium castaneum] &gt;gi|642938579|ref|XP_008199849.1| PREDICTED: plasma membrane calcium-transporting ATPase 2 isoform X1 [Tribolium castaneum] &gt;gi|642938581|ref|XP_008199850.1| PREDICTED: plasma membrane calcium-transporting ATPase 2 isoform X1 [Tribolium castaneum] &gt;gi|642938583|ref…	gi|498985551|ref|XM_004530576.1|/8e-66/PREDICTED: Ceratitis capitata plasma membrane calcium-transporting ATPase 3-like (LOC101455930), transcript variant X9, mRNA	sp|Q16720|AT2B3_HUMAN/0.0/Plasma membrane calcium-transporting ATPase 3 OS=Homo sapiens GN=ATP2B3 PE=1 SV=3	tca:656486/0.0/plasma membrane calcium-transporting ATPase 1; K05850 Ca2+ transporting ATPase, plasma membrane [EC:3.6.3.8]	mll5286/0.0/---	PF00690/3.3E-16/Cation transporter/ATPase, N-terminus	biological_process:GO:0070588//calcium ion transmembrane transport;cellular_component:GO:0016021//integral component of membrane;molecular_function:GO:0046872//metal ion binding;GO:0005524//ATP binding;GO:0005388//calcium-transporting ATPase activity;
	CL1833.Contig2_All	-1.19507	1.18e-44	5.59e-43	Down	gi|642923595|ref|XP_008193574.1|/0/PREDICTED: multidrug resistance-associated protein 4-like [Tribolium castaneum]	gi|514791947|ref|XM_005030279.1|/6e-06/PREDICTED: Anas platyrhynchos multidrug resistance-associated protein 1-like (LOC101794339), mRNA	sp|O15439|MRP4_HUMAN/0.0/Multidrug resistance-associated protein 4 OS=Homo sapiens GN=ABCC4 PE=1 SV=3	tca:660659/0.0/multidrug resistance-associated protein 4-like; K05673 ATP-binding cassette, subfamily C (CFTR/MRP), member 4	YDR135c/5e-177/---	PF00005/2.2E-17/ABC transporter	biological_process:GO:0006810//transport;GO:0009987//cellular process;molecular_function:GO:0000166//nucleotide binding;GO:0016887//ATPase activity;
	CL2272.Contig1_All	-1.11601	2.96e-37	1.16e-35	Down	gi|642930474|ref|XP_008196417.1|/0/PREDICTED: sodium/potassium-transporting ATPase subunit alpha isoform X1 [Tribolium castaneum]	gi|407731617|gb|JQ771526.1|/0.0/Tetraopes tetrophthalmus Na+,K+ ATPase alpha-subunit 1 mRNA, complete cds	sp|P13607|ATNA_DROME/0.0/Sodium/potassium-transporting ATPase subunit alpha OS=Drosophila melanogaster GN=Atpalpha PE=1 SV=3	tca:663833/0.0/sodium/potassium-transporting ATPase subunit alpha; K01539 sodium/potassium-transporting ATPase subunit alpha [EC:3.6.3.9]	MA4378/0.0/---	PTHR24093:SF244/0.0/--	NA
	Unigene5669_All	-1.06228	2.84e-08	2.62e-07	Down	gi|270002220|gb|EEZ98667.1|/0/hypothetical protein TcasGA2_TC001199 [Tribolium castaneum]	NA	sp|F1NHE9|KCJ12_CHICK/1e-96/ATP-sensitive inward rectifier potassium channel 12 OS=Gallus gallus GN=KCNJ12 PE=1 SV=1	tca:654910/6e-167/ATP-sensitive inward rectifier potassium channel 12; K05330 potassium inwardly-rectifying channel subfamily J, other	NA	PR01320/6.5E-55/Inward rectifier K+ channel superfamily signature	NA
	CL924.Contig3_All	-1.01832	4.81e-05	0.000282	Down	gi|642933440|ref|XP_008197421.1|/3.29263e-158/PREDICTED: probable ATP-dependent RNA helicase DDX46 [Tribolium castaneum]	NA	sp|Q569Z5|DDX46_MOUSE/2e-65/Probable ATP-dependent RNA helicase DDX46 OS=Mus musculus GN=Ddx46 PE=1 SV=2	tca:661902/5e-159/probable ATP-dependent RNA helicase DDX46; K12811 ATP-dependent RNA helicase DDX46/PRP5 [EC:3.6.4.13]	YBR237w/9e-10/---	PTHR24031:SF158/8.9E-23/--	NA
succinate dehydrogenase	CL1851.Contig2_All	1.32931	1.1e-05	7.16e-05	Up	gi|642931526|ref|XP_008196622.1|/2.84836e-154/PREDICTED: 227 kDa spindle- and centromere-associated protein isoform X1 [Tribolium castaneum]	NA	sp|Q7SXT7|ZC21A_DANRE/9e-30/Zinc finger C2HC domain-containing protein 1A OS=Danio rerio GN=zc2hc1a PE=2 SV=1	cfo:105251968/4e-36/succinate dehydrogenase [ubiquinone] flavoprotein subunit, mitochondrial-like; K00234 succinate dehydrogenase (ubiquinone) flavoprotein subunit [EC:1.3.5.1]	FN0522/6e-08/---	PTHR13555/1.1E-37/--	NA
