# Supplementary material for: Toxicity of Melaleuca alternifolia essential oil to the mitochondrion and NAD+/NADH dehydrogenase in Tribolium confusum
Source: PeerJ. 2018 Nov 13;6:e5693. doi: 10.7717/peerj.5693 (PMC6238770; doi:10.7717/peerj.5693)
Supplement: Supplemental Information 4 — Differentially expressed genes in respiration- related enzymes. [file peerj-06-5693-s004.xlsx]

## Sheet: S3
S3 Table Differentially expressed genes in xenobiotic detoxification- related enzymes
# Classification	GeneID	log2Fold	Pvalue	FDR	Regulation	Nr	Nt	Swissprot	KEGG	COG	Interpro	GO
GST	Unigene401_All	-1.32739	1.08e-07	9.34e-07	Down	gi|642928248|ref|XP_008195505.1|/8.92347e-79/PREDICTED: prostaglandin E synthase-like isoform X1 [Tribolium castaneum]	gi|392315970|gb|JN695810.1|/9e-41/Tribolium castaneum microsomal glutathione S-transferase-like protein (Mgst3) gene, complete cds	sp|Q6PWL6|PTGES_MACFA/2e-15/Prostaglandin E synthase OS=Macaca fascicularis GN=PTGES PE=2 SV=1	tca:103313605/2e-79/Mgst4; microsomal glutathione S-transferase 1-like; K00799 glutathione S-transferase [EC:2.5.1.18]	NA	PF01124/3.3E-23/MAPEG family	NA
	Unigene930_All	1.55794	7.66e-227	1.64e-224	Up	gi|91078252|ref|XP_970714.1|/2.44111e-94/PREDICTED: glutathione S-transferase [Tribolium castaneum] &gt;gi|270003939|gb|EFA00387.1| hypothetical protein TcasGA2_TC003233 [Tribolium castaneum]	gi|110681737|gb|AC154132.2|/2e-17/Tribolium castaneum BAC T.cast_C43A19 () complete sequence	sp|O18598|GST1_BLAGE/7e-55/Glutathione S-transferase OS=Blattella germanica PE=1 SV=3	tca:659302/4e-95/glutathione S-transferase; K01830 prostaglandin-H2 D-isomerase [EC:5.3.99.2]	NA	PTHR11571:SF118/1.1E-75/--	NA
	Unigene964_All	1.27282	1.32e-149	1.95e-147	Up	gi|642917962|ref|XP_008198961.1|/1.05173e-105/PREDICTED: probable phospholipid hydroperoxide glutathione peroxidase [Tribolium castaneum] &gt;gi|270004924|gb|EFA01372.1| hypothetical protein TcasGA2_TC010362 [Tribolium castaneum]	gi|283046725|ref|NM_001170838.1|/3e-66/Tribolium castaneum glutathione peroxidase (LOC658307), mRNA	sp|Q32QL6|GPX4_CALJA/4e-50/Phospholipid hydroperoxide glutathione peroxidase, mitochondrial OS=Callithrix jacchus GN=GPX4 PE=2 SV=2	pxy:105396022/5e-68/probable phospholipid hydroperoxide glutathione peroxidase; K00432 glutathione peroxidase [EC:1.11.1.9]	CAC1570/1e-37/---	PS00460/-/Glutathione peroxidases active site.	biological_process:GO:0006979//response to oxidative stress;GO:0055114//oxidation-reduction process;molecular_function:GO:0004602//glutathione peroxidase activity;
	CL3581.Contig1_All	-2.75177	3.67e-107	4.23e-105	Down	gi|642912626|ref|XP_008200938.1|/1.53669e-102/PREDICTED: glutathione S-transferase 1-like [Tribolium castaneum] &gt;gi|270002390|gb|EEZ98837.1| hypothetical protein TcasGA2_TC004446 [Tribolium castaneum]	gi|91076565|ref|XM_962054.1|/3e-46/PREDICTED: Tribolium castaneum glutathione S-transferase 1-1 (LOC655499), mRNA	sp|P42860|GSTT1_LUCCU/1e-42/Glutathione S-transferase 1-1 OS=Lucilia cuprina GN=GST1 PE=1 SV=2	tca:655415/2e-103/glutathione S-transferase 1-like; K00799 glutathione S-transferase [EC:2.5.1.18]	SMb20005/2e-13/---	PF13417/1.7E-12/Glutathione S-transferase, N-terminal domain	NA
	Unigene2120_All	-1.64191	1.47e-100	1.61e-98	Down	gi|189234262|ref|XP_966966.2|/3.12552e-105/PREDICTED: glutathione S-transferase 1 [Tribolium castaneum] &gt;gi|270002619|gb|EEZ99066.1| hypothetical protein TcasGA2_TC004942 [Tribolium castaneum]	gi|91076565|ref|XM_962054.1|/2e-12/PREDICTED: Tribolium castaneum glutathione S-transferase 1-1 (LOC655499), mRNA	sp|P46430|GSTT1_MANSE/2e-44/Glutathione S-transferase 1 OS=Manduca sexta GN=GST1 PE=2 SV=1	tca:655331/5e-106/glutathione S-transferase 1; K00799 glutathione S-transferase [EC:2.5.1.18]	SMb20005/2e-13/---	PS50405/16.064/Soluble glutathione S-transferase C-terminal domain profile.	NA
	Unigene3770_All	-1.43291	1.81e-28	5.52e-27	Down	gi|91076560|ref|XP_966872.1|/2.41395e-104/PREDICTED: glutathione S-transferase 1 [Tribolium castaneum] &gt;gi|270002618|gb|EEZ99065.1| hypothetical protein TcasGA2_TC004941 [Tribolium castaneum]	NA	sp|P46430|GSTT1_MANSE/2e-40/Glutathione S-transferase 1 OS=Manduca sexta GN=GST1 PE=2 SV=1	tca:655250/4e-105/glutathione S-transferase 1; K00799 glutathione S-transferase [EC:2.5.1.18]	PA1655/4e-10/---	PF13417/1.1E-10/Glutathione S-transferase, N-terminal domain	NA
	CL1792.Contig1_All	-1.10678	4.2e-07	3.37e-06	Down	gi|91078252|ref|XP_970714.1|/4.61007e-61/PREDICTED: glutathione S-transferase [Tribolium castaneum] &gt;gi|270003939|gb|EFA00387.1| hypothetical protein TcasGA2_TC003233 [Tribolium castaneum]	gi|110189816|gb|DQ662542.1|/5e-09/Mayetiola destructor sigma GST (GST-2) mRNA, complete cds	sp|O18598|GST1_BLAGE/8e-46/Glutathione S-transferase OS=Blattella germanica PE=1 SV=3	tca:659302/8e-62/glutathione S-transferase; K01830 prostaglandin-H2 D-isomerase [EC:5.3.99.2]	NA	PTHR11571/2.4E-36/--	NA
	Unigene10388_All	-1.30101	4.47e-19	9.18e-18	Down	gi|642912738|ref|XP_966526.2|/6.56411e-108/PREDICTED: uncharacterized protein LOC654964 [Tribolium castaneum]	NA	sp|P46430|GSTT1_MANSE/9e-40/Glutathione S-transferase 1 OS=Manduca sexta GN=GST1 PE=2 SV=1	tca:654964/1e-108/uncharacterized LOC654964; K00799 glutathione S-transferase [EC:2.5.1.18]	sll0067/2e-13/---	PS50404/22.499/Soluble glutathione S-transferase N-terminal domain profile.	NA
P450	Unigene12059_All	7.48382	5.52e-05	0.00032	Up	gi|642937605|ref|XP_008199118.1|/2.05758e-88/PREDICTED: probable cytochrome P450 28a5 [Tribolium castaneum]	NA	sp|Q9V419|C28A5_DROME/2e-40/Probable cytochrome P450 28a5 OS=Drosophila melanogaster GN=Cyp28a5 PE=2 SV=1	tca:103314542/4e-87/probable cytochrome P450 6a13; K14999 cytochrome P450, family 6 [EC:1.14.-.-]	NA	PTHR24292:SF44/9.2E-71/--	NA
	CL426.Contig5_All	6.88264	0.00011112	0.000607647	Up	gi|642921833|ref|XP_008199339.1|/2.27373e-39/PREDICTED: uncharacterized protein LOC659608 isoform X2 [Tribolium castaneum]	NA	NA	tca:659608/4e-40/uncharacterized LOC659608; K15005 cytochrome P450, family 28 [EC:1.14.-.-]	NA	NA	NA
	Unigene4596_All	3.76257	4.73e-127	6.35e-125	Up	gi|270009245|gb|EFA05693.1|/0/cytochrome P450 6BK13 [Tribolium castaneum]	gi|194353943|ref|NM_001130403.1|/3e-06/Tribolium castaneum cytochrome P450 CYP6BK4 (Cyp6bk4), mRNA	sp|Q27593|CP6A8_DROME/2e-117/Cytochrome P450 6a8 OS=Drosophila melanogaster GN=Cyp6a8 PE=2 SV=2	tca:658130/0.0/CYP6BK13; cytochrome P450 6BK13; K14999 cytochrome P450, family 6 [EC:1.14.-.-]	Cj1411c/8e-31/---	PF00067/1.4E-102/Cytochrome P450	NA
	Unigene6823_All	2.85148	8e-306	2.31e-303	Up	gi|270009245|gb|EFA05693.1|/0/cytochrome P450 6BK13 [Tribolium castaneum]	gi|194353943|ref|NM_001130403.1|/3e-06/Tribolium castaneum cytochrome P450 CYP6BK4 (Cyp6bk4), mRNA	sp|P33270|CP6A2_DROME/5e-116/Cytochrome P450 6a2 OS=Drosophila melanogaster GN=Cyp6a2 PE=2 SV=2	tca:658130/0.0/CYP6BK13; cytochrome P450 6BK13; K14999 cytochrome P450, family 6 [EC:1.14.-.-]	Cj1411c/2e-34/---	PR00385/8.3E-12/P450 superfamily signature	NA
	Unigene8868_All	2.62037	1.14e-135	1.62e-133	Up	gi|194353944|ref|NP_001123875.1|/0/cytochrome P450 CYP6BK4 [Tribolium castaneum] &gt;gi|270016186|gb|EFA12634.1| cytochrome P450 6BK4 [Tribolium castaneum]	gi|194353943|ref|NM_001130403.1|/7e-81/Tribolium castaneum cytochrome P450 CYP6BK4 (Cyp6bk4), mRNA	sp|P13527|CP6A1_MUSDO/9e-113/Cytochrome P450 6A1 OS=Musca domestica GN=CYP6A1 PE=2 SV=1	tca:658976/0.0/Cyp6bk4; cytochrome P450 CYP6BK4; K14999 cytochrome P450, family 6 [EC:1.14.-.-]	Cj1411c/9e-36/---	PR00463/9.6E-20/E-class P450 group I signature	biological_process:GO:0055114//oxidation-reduction process;molecular_function:GO:0009055//electron carrier activity;GO:0016705//oxidoreductase activity, acting on paired donors, with incorporation or reduction of molecular oxygen;GO:0020037//heme binding;GO:0005506//iron ion binding;GO:0004497//monooxygenase activity;
	CL3082.Contig1_All	2.55394	1.13e-06	8.5e-06	Up	gi|270002891|gb|EEZ99338.1|/0/cytochrome P450 6BQ13 [Tribolium castaneum]	gi|219522035|ref|NM_001143728.1|/1e-56/Tribolium castaneum cytochrome P450 monooxygenase (CYP6BQ13), mRNA >gi|207667275|gb|FJ209361.1| Tribolium castaneum cytochrome P450 monooxygenase mRNA, complete cds	sp|Q9V773|C6A20_DROME/1e-75/Probable cytochrome P450 6a20 OS=Drosophila melanogaster GN=Cyp6a20 PE=2 SV=2	tca:655498/0.0/CYP6BQ13; cytochrome P450 monooxygenase; K14999 cytochrome P450, family 6 [EC:1.14.-.-]	mlr5192/8e-07/---	PR00464/5.7E-10/Group II E-class P450 signature	biological_process:GO:0055114//oxidation-reduction process;molecular_function:GO:0009055//electron carrier activity;GO:0016705//oxidoreductase activity, acting on paired donors, with incorporation or reduction of molecular oxygen;GO:0020037//heme binding;GO:0005506//iron ion binding;GO:0004497//monooxygenase activity;
	Unigene10500_All	2.25168	2.11e-05	0.00013122	Up	gi|197260156|gb|ACH56621.1|/1.22447e-08/cytochrome P450 [Tribolium castaneum]	gi|197260155|gb|EU924172.1|/1e-24/Tribolium castaneum clone F16 cytochrome P450 mRNA, partial cds	NA	tca:103314836/9e-08/CYP6BK5; probable cytochrome P450 6a23; K14999 cytochrome P450, family 6 [EC:1.14.-.-]	NA	NA	NA
	CL3315.Contig2_All	2.23895	8.51e-81	7.36e-79	Up	gi|642938930|ref|XP_008200093.1|/1.00755e-168/PREDICTED: LOW QUALITY PROTEIN: probable cytochrome P450 6a23 [Tribolium castaneum]	gi|197260155|gb|EU924172.1|/1e-150/Tribolium castaneum clone F16 cytochrome P450 mRNA, partial cds	sp|P33270|CP6A2_DROME/2e-91/Cytochrome P450 6a2 OS=Drosophila melanogaster GN=Cyp6a2 PE=2 SV=2	tca:658544/2e-169/probable cytochrome P450 6a23; K14999 cytochrome P450, family 6 [EC:1.14.-.-]	AGc2890/4e-31/---	PR00463/4.4E-22/E-class P450 group I signature	biological_process:GO:0055114//oxidation-reduction process;molecular_function:GO:0009055//electron carrier activity;GO:0016705//oxidoreductase activity, acting on paired donors, with incorporation or reduction of molecular oxygen;GO:0020037//heme binding;GO:0005506//iron ion binding;GO:0004497//monooxygenase activity;
	Unigene124_All	2.15528	2.06e-17	3.83e-16	Up	gi|270008226|gb|EFA04674.1|/0/cytochrome P450 346A1 [Tribolium castaneum]	gi|557769461|ref|XM_005184347.1|/9e-06/PREDICTED: Musca domestica probable cytochrome P450 6a14-like (LOC101892447), mRNA	sp|Q9V4U7|C6A14_DROME/9e-93/Probable cytochrome P450 6a14 OS=Drosophila melanogaster GN=Cyp6a14 PE=3 SV=2	tca:656267/0.0/CYP346A1; cytochrome P450 346A1; K14999 cytochrome P450, family 6 [EC:1.14.-.-]	SMc02579/3e-29/---	PF00067/5.6E-92/Cytochrome P450	molecular_function:GO:0046872//metal ion binding;GO:0016491//oxidoreductase activity;
	Unigene10411_All	2.07917	2.51e-24	6.63e-23	Up	gi|642938930|ref|XP_008200093.1|/2.00596e-63/PREDICTED: LOW QUALITY PROTEIN: probable cytochrome P450 6a23 [Tribolium castaneum]	gi|399761427|gb|EF421246.3|/1e-06/Liposcelis bostrychophila cytochrome P450 (CYP6CE2) mRNA, complete cds	sp|Q27593|CP6A8_DROME/1e-26/Cytochrome P450 6a8 OS=Drosophila melanogaster GN=Cyp6a8 PE=2 SV=2	tca:658544/3e-64/probable cytochrome P450 6a23; K14999 cytochrome P450, family 6 [EC:1.14.-.-]	NA	PF00067/2.3E-7/Cytochrome P450	NA
	Unigene1583_All	2.02007	4.58e-10	5.12e-09	Up	gi|642938930|ref|XP_008200093.1|/2.98037e-89/PREDICTED: LOW QUALITY PROTEIN: probable cytochrome P450 6a23 [Tribolium castaneum]	gi|470011951|gb|KC686848.1|/2e-10/Tribolium castaneum strain Pyr cytochrome P450 6BQ8 (CYP6BQ8) mRNA, complete cds	sp|P33270|CP6A2_DROME/3e-37/Cytochrome P450 6a2 OS=Drosophila melanogaster GN=Cyp6a2 PE=2 SV=2	tca:658544/5e-90/probable cytochrome P450 6a23; K14999 cytochrome P450, family 6 [EC:1.14.-.-]	NA	PTHR24292:SF5/1.6E-71/--	biological_process:GO:0055114//oxidation-reduction process;molecular_function:GO:0009055//electron carrier activity;GO:0016705//oxidoreductase activity, acting on paired donors, with incorporation or reduction of molecular oxygen;GO:0020037//heme binding;GO:0005506//iron ion binding;GO:0004497//monooxygenase activity;
	CL3046.Contig1_All	1.84158	3.39e-41	1.48e-39	Up	gi|189241724|ref|XP_001809620.1|/0/PREDICTED: cytochrome P450 6k1-like [Tribolium castaneum]	NA	sp|Q964T2|CP9E2_BLAGE/2e-84/Cytochrome P450 9e2 OS=Blattella germanica GN=CYP9E2 PE=2 SV=1	tca:100142088/0.0/cytochrome P450 6k1-like; K15005 cytochrome P450, family 28 [EC:1.14.-.-]	BH0579/2e-27/---	PR00385/3.7E-10/P450 superfamily signature	NA
	CL1260.Contig2_All	1.82321	4.65e-27	1.35e-25	Up	gi|649572299|ref|NP_001280531.1|/2.81911e-161/cytochrome P450 6BQ11 [Tribolium castaneum] &gt;gi|270006376|gb|EFA02824.1| cytochrome P450 6BQ11 [Tribolium castaneum] &gt;gi|470011991|gb|AGI03851.1| cytochrome P450 6BQ11 [Tribolium castaneum]	gi|470011984|gb|KC686855.1|/6e-34/Tribolium castaneum strain LBS cytochrome P450 6BQ10 (CYP6BQ10) mRNA, complete cds	sp|P13527|CP6A1_MUSDO/4e-73/Cytochrome P450 6A1 OS=Musca domestica GN=CYP6A1 PE=2 SV=1	tca:664465/5e-162/CYP6BQ11; cytochrome P450 6BQ11; K14999 cytochrome P450, family 6 [EC:1.14.-.-]	Cj1411c/4e-09/---	PTHR24292:SF5/9.9E-140/--	biological_process:GO:0055114//oxidation-reduction process;molecular_function:GO:0009055//electron carrier activity;GO:0016705//oxidoreductase activity, acting on paired donors, with incorporation or reduction of molecular oxygen;GO:0020037//heme binding;GO:0005506//iron ion binding;GO:0004497//monooxygenase activity;
	Unigene4449_All	1.80773	4.67e-62	3.15e-60	Up	gi|270006369|gb|EFA02817.1|/0/cytochrome P450 6BQ2 [Tribolium castaneum]	gi|157120793|ref|XM_001653624.1|/2e-07/Aedes aegypti cytochrome P450 partial mRNA	sp|Q9V773|C6A20_DROME/6e-114/Probable cytochrome P450 6a20 OS=Drosophila melanogaster GN=Cyp6a20 PE=2 SV=2	tca:664466/0.0/CYP6BQ10, GLEAN_07320; cytochrome P450 6BQ10; K14999 cytochrome P450, family 6 [EC:1.14.-.-]	BH0579/4e-28/---	PF00067/1.3E-94/Cytochrome P450	molecular_function:GO:0046872//metal ion binding;GO:0016491//oxidoreductase activity;
	CL1260.Contig1_All	1.71474	4.49e-127	6.05e-125	Up	gi|649572299|ref|NP_001280531.1|/0/cytochrome P450 6BQ11 [Tribolium castaneum] &gt;gi|270006376|gb|EFA02824.1| cytochrome P450 6BQ11 [Tribolium castaneum] &gt;gi|470011991|gb|AGI03851.1| cytochrome P450 6BQ11 [Tribolium castaneum]	gi|470011990|gb|KC686858.1|/4e-79/Tribolium castaneum strain LBS cytochrome P450 6BQ11 (CYP6BQ11) mRNA, complete cds	sp|Q9V4U7|C6A14_DROME/4e-117/Probable cytochrome P450 6a14 OS=Drosophila melanogaster GN=Cyp6a14 PE=3 SV=2	tca:664465/0.0/CYP6BQ11; cytochrome P450 6BQ11; K14999 cytochrome P450, family 6 [EC:1.14.-.-]	BH0579/2e-29/---	PR00463/3.1E-23/E-class P450 group I signature	biological_process:GO:0055114//oxidation-reduction process;molecular_function:GO:0009055//electron carrier activity;GO:0016705//oxidoreductase activity, acting on paired donors, with incorporation or reduction of molecular oxygen;GO:0020037//heme binding;GO:0005506//iron ion binding;GO:0004497//monooxygenase activity;
	Unigene6497_All	1.6553	4.62e-228	9.94e-226	Up	gi|270008167|gb|EFA04615.1|/0/cytochrome P450-like protein [Tribolium castaneum]	gi|488532159|ref|XM_004457770.1|/7e-13/PREDICTED: Dasypus novemcinctus cytochrome P450 4V2-like (LOC101424148), transcript variant 4, mRNA	sp|Q9VA27|CP4C3_DROME/3e-110/Cytochrome P450 4c3 OS=Drosophila melanogaster GN=Cyp4c3 PE=2 SV=1	tca:660657/0.0/cytochrome P450 4c3-like; K15001 cytochrome P450, family 4 [EC:1.14.-.-]	BH0579/1e-39/---	PF00067/1.9E-124/Cytochrome P450	NA
	Unigene11222_All	1.58555	7.28e-37	2.83e-35	Up	gi|270006369|gb|EFA02817.1|/0/cytochrome P450 6BQ2 [Tribolium castaneum]	gi|470011967|gb|KC686850.1|/1e-11/Tribolium castaneum strain LBS cytochrome P450 6BQ8 (CYP6BQ8) mRNA, complete cds	sp|Q9V773|C6A20_DROME/1e-114/Probable cytochrome P450 6a20 OS=Drosophila melanogaster GN=Cyp6a20 PE=2 SV=2	tca:664475/0.0/CYP6BQ5; probable cytochrome P450 6a14; K14999 cytochrome P450, family 6 [EC:1.14.-.-]	BH0579/1e-26/---	PF00067/2.1E-93/Cytochrome P450	NA
	Unigene11221_All	1.57421	2.04e-18	4.03e-17	Up	gi|270006369|gb|EFA02817.1|/0/cytochrome P450 6BQ2 [Tribolium castaneum]	gi|157120793|ref|XM_001653624.1|/1e-07/Aedes aegypti cytochrome P450 partial mRNA	sp|Q9V773|C6A20_DROME/3e-108/Probable cytochrome P450 6a20 OS=Drosophila melanogaster GN=Cyp6a20 PE=2 SV=2	tca:664466/5e-166/CYP6BQ10, GLEAN_07320; cytochrome P450 6BQ10; K14999 cytochrome P450, family 6 [EC:1.14.-.-]	AGc2890/1e-24/---	PTHR24292:SF5/2.5E-215/--	molecular_function:GO:0046872//metal ion binding;GO:0016491//oxidoreductase activity;
	CL1044.Contig1_All	1.53937	1.83e-09	1.91e-08	Up	gi|194473697|ref|NP_001123993.1|/5.96234e-132/cytochrome P450 CYP4BN1 [Tribolium castaneum]	gi|93278144|gb|DQ471881.1|/7e-13/Ips paraconfusus CYP4BH1 (CYP4BH1) mRNA, complete cds	sp|O46051|C4D14_DROME/1e-92/Probable cytochrome P450 4d14 OS=Drosophila melanogaster GN=Cyp4d14 PE=3 SV=1	tca:660538/9e-133/Cyp4bn1; cytochrome P450 CYP4BN1; K15001 cytochrome P450, family 4 [EC:1.14.-.-]	BH0579/6e-37/---	PR00385/1.4E-16/P450 superfamily signature	NA
	CL1260.Contig3_All	1.51092	5.98e-10	6.59e-09	Up	gi|649572299|ref|NP_001280531.1|/4.98801e-83/cytochrome P450 6BQ11 [Tribolium castaneum] &gt;gi|270006376|gb|EFA02824.1| cytochrome P450 6BQ11 [Tribolium castaneum] &gt;gi|470011991|gb|AGI03851.1| cytochrome P450 6BQ11 [Tribolium castaneum]	gi|470011990|gb|KC686858.1|/7e-51/Tribolium castaneum strain LBS cytochrome P450 6BQ11 (CYP6BQ11) mRNA, complete cds	sp|Q9V771|C6A23_DROME/4e-48/Probable cytochrome P450 6a23 OS=Drosophila melanogaster GN=Cyp6a23 PE=2 SV=2	tca:664465/8e-84/CYP6BQ11; cytochrome P450 6BQ11; K14999 cytochrome P450, family 6 [EC:1.14.-.-]	slr0574/4e-18/---	PTHR24292:SF5/1.9E-89/--	biological_process:GO:0055114//oxidation-reduction process;molecular_function:GO:0009055//electron carrier activity;GO:0016705//oxidoreductase activity, acting on paired donors, with incorporation or reduction of molecular oxygen;GO:0020037//heme binding;GO:0005506//iron ion binding;GO:0004497//monooxygenase activity;
	Unigene1920_All	1.48601	7.62e-247	1.81e-244	Up	gi|642931814|ref|XP_008196744.1|/0/PREDICTED: cytochrome P450 9Z4 isoform X1 [Tribolium castaneum]	gi|282720994|ref|NM_001170777.1|/2e-47/Tribolium castaneum cytochrome P450 9Z4 (CYP9Z4), mRNA	sp|Q964T2|CP9E2_BLAGE/6e-145/Cytochrome P450 9e2 OS=Blattella germanica GN=CYP9E2 PE=2 SV=1	tca:664295/0.0/CYP9Z4, GLEAN_06444; cytochrome P450 9Z4; K15003 cytochrome P450, family 9 [EC:1.14.-.-]	AGc2890/6e-27/---	PTHR24292:SF24/8.0E-195/--	biological_process:GO:0055114//oxidation-reduction process;molecular_function:GO:0009055//electron carrier activity;GO:0016705//oxidoreductase activity, acting on paired donors, with incorporation or reduction of molecular oxygen;GO:0020037//heme binding;GO:0005506//iron ion binding;GO:0004497//monooxygenase activity;
	CL425.Contig1_All	1.45376	2.61e-19	5.42e-18	Up	gi|270009235|gb|EFA05683.1|/0/cytochrome P450 6BK11 [Tribolium castaneum]	gi|282847464|ref|NM_001170810.1|/2e-10/Tribolium castaneum cytochrome P450 CYP6BK17 (CYP6BK17), mRNA >gi|161344970|gb|EU266589.1| Tribolium castaneum clone F05 cytochrome P450 CYP6BK17 mRNA, complete cds	sp|Q9V4U7|C6A14_DROME/4e-115/Probable cytochrome P450 6a14 OS=Drosophila melanogaster GN=Cyp6a14 PE=3 SV=2	tca:656770/0.0/CYP6BK11; cytochrome P450 6BK11; K14999 cytochrome P450, family 6 [EC:1.14.-.-]	Cj1411c/5e-28/---	PF00067/3.3E-101/Cytochrome P450	biological_process:GO:0055114//oxidation-reduction process;molecular_function:GO:0009055//electron carrier activity;GO:0016705//oxidoreductase activity, acting on paired donors, with incorporation or reduction of molecular oxygen;GO:0020037//heme binding;GO:0005506//iron ion binding;GO:0004497//monooxygenase activity;
	CL3046.Contig2_All	1.40988	0.00018415	0.00096445	Up	gi|189241724|ref|XP_001809620.1|/0/PREDICTED: cytochrome P450 6k1-like [Tribolium castaneum]	NA	sp|Q964R0|CP6K1_BLAGE/2e-81/Cytochrome P450 6k1 OS=Blattella germanica GN=CYP6K1 PE=2 SV=1	tca:100142088/0.0/cytochrome P450 6k1-like; K15005 cytochrome P450, family 28 [EC:1.14.-.-]	BH0579/8e-26/---	PTHR24292:SF5/1.4E-101/--	NA
	CL1540.Contig2_All	1.35473	3.3e-05	0.00019866	Up	gi|642931814|ref|XP_008196744.1|/3.16719e-98/PREDICTED: cytochrome P450 9Z4 isoform X1 [Tribolium castaneum]	gi|282720994|ref|NM_001170777.1|/2e-14/Tribolium castaneum cytochrome P450 9Z4 (CYP9Z4), mRNA	sp|Q964T2|CP9E2_BLAGE/1e-67/Cytochrome P450 9e2 OS=Blattella germanica GN=CYP9E2 PE=2 SV=1	tca:664295/5e-99/CYP9Z4, GLEAN_06444; cytochrome P450 9Z4; K15003 cytochrome P450, family 9 [EC:1.14.-.-]	slr0574/2e-23/---	PTHR24292:SF24/2.9E-104/--	biological_process:GO:0055114//oxidation-reduction process;molecular_function:GO:0009055//electron carrier activity;GO:0016705//oxidoreductase activity, acting on paired donors, with incorporation or reduction of molecular oxygen;GO:0020037//heme binding;GO:0005506//iron ion binding;GO:0004497//monooxygenase activity;
	CL928.Contig1_All	1.29653	2.74e-69	2.1e-67	Up	gi|270014308|gb|EFA10756.1|/0/cytochrome P450-like protein [Tribolium castaneum]	gi|86515409|ref|NM_001039440.1|/2e-65/Tribolium castaneum cytochrome P450 monooxygenase CYP4Q4 (CYP4Q4), mRNA >gi|7804913|gb|AF251548.1|AF251548 Tribolium castaneum cytochrome P450 monooxigenase CYP4Q4 (CYP4Q4) mRNA, complete cds	sp|P29981|CP4C1_BLADI/3e-111/Cytochrome P450 4C1 OS=Blaberus discoidalis GN=CYP4C1 PE=2 SV=1	tca:641609/0.0/CYP4Q4; cytochrome P450 monooxygenase CYP4Q4 (EC:1.14.14.1); K15001 cytochrome P450, family 4 [EC:1.14.-.-]	VNG0422G/2e-38/---	PR00463/2.6E-21/E-class P450 group I signature	biological_process:GO:0055114//oxidation-reduction process;molecular_function:GO:0009055//electron carrier activity;GO:0016705//oxidoreductase activity, acting on paired donors, with incorporation or reduction of molecular oxygen;GO:0020037//heme binding;GO:0005506//iron ion binding;GO:0004497//monooxygenase activity;
	Unigene8856_All	1.28737	6.89e-19	1.39e-17	Up	gi|642915805|ref|XP_008200085.1|/0/PREDICTED: probable cytochrome P450 9f2 [Tribolium castaneum]	NA	sp|Q964T2|CP9E2_BLAGE/2e-122/Cytochrome P450 9e2 OS=Blattella germanica GN=CYP9E2 PE=2 SV=1	tca:657454/0.0/probable cytochrome P450 9f2; K15003 cytochrome P450, family 9 [EC:1.14.-.-]	AGc2890/4e-31/---	PF00067/2.2E-85/Cytochrome P450	molecular_function:GO:0005488//binding;GO:0016491//oxidoreductase activity;
	Unigene7550_All	1.2815	3.41e-07	2.77e-06	Up	gi|642931814|ref|XP_008196744.1|/4.61178e-73/PREDICTED: cytochrome P450 9Z4 isoform X1 [Tribolium castaneum]	gi|282720994|ref|NM_001170777.1|/1e-17/Tribolium castaneum cytochrome P450 9Z4 (CYP9Z4), mRNA	sp|Q964T2|CP9E2_BLAGE/6e-34/Cytochrome P450 9e2 OS=Blattella germanica GN=CYP9E2 PE=2 SV=1	tca:664295/8e-74/CYP9Z4, GLEAN_06444; cytochrome P450 9Z4; K15003 cytochrome P450, family 9 [EC:1.14.-.-]	NA	PTHR24292/4.0E-38/--	biological_process:GO:0055114//oxidation-reduction process;molecular_function:GO:0009055//electron carrier activity;GO:0016705//oxidoreductase activity, acting on paired donors, with incorporation or reduction of molecular oxygen;GO:0020037//heme binding;GO:0005506//iron ion binding;GO:0004497//monooxygenase activity;
	Unigene9284_All	1.26705	5.83e-06	3.97e-05	Up	gi|270006370|gb|EFA02818.1|/1.39959e-68/cytochrome P450 6BQ4 [Tribolium castaneum]	gi|470011990|gb|KC686858.1|/3e-12/Tribolium castaneum strain LBS cytochrome P450 6BQ11 (CYP6BQ11) mRNA, complete cds	sp|Q9V4U9|C6A13_DROME/8e-38/Probable cytochrome P450 6a13 OS=Drosophila melanogaster GN=Cyp6a13 PE=2 SV=1	tca:664473/2e-53/CYP6BQ6; cytochrome P450 6BQ6; K14999 cytochrome P450, family 6 [EC:1.14.-.-]	VNG0422G/2e-17/---	PR00385/9.4E-6/P450 superfamily signature	molecular_function:GO:0046872//metal ion binding;GO:0016491//oxidoreductase activity;
	CL359.Contig1_All	1.23736	1.15e-29	3.68e-28	Up	gi|270006373|gb|EFA02821.1|/0/cytochrome P450 6BQ7 [Tribolium castaneum]	gi|470011984|gb|KC686855.1|/8e-25/Tribolium castaneum strain LBS cytochrome P450 6BQ10 (CYP6BQ10) mRNA, complete cds	sp|Q9V4U7|C6A14_DROME/3e-111/Probable cytochrome P450 6a14 OS=Drosophila melanogaster GN=Cyp6a14 PE=3 SV=2	tca:664471/0.0/CYP6BQ7; probable cytochrome P450 6a14; K14999 cytochrome P450, family 6 [EC:1.14.-.-]	Cj1411c/8e-30/---	PF00067/4.7E-104/Cytochrome P450	biological_process:GO:0055114//oxidation-reduction process;molecular_function:GO:0009055//electron carrier activity;GO:0016705//oxidoreductase activity, acting on paired donors, with incorporation or reduction of molecular oxygen;GO:0020037//heme binding;GO:0005506//iron ion binding;GO:0004497//monooxygenase activity;
	Unigene10818_All	1.16481	2.61e-104	2.91e-102	Up	gi|194363749|ref|NP_001123908.1|/0/cytochrome P450 CYP18A1 [Tribolium castaneum] &gt;gi|270014221|gb|EFA10669.1| cytochrome P450 18A1 [Tribolium castaneum]	gi|194363748|ref|NM_001130436.1|/0.0/Tribolium castaneum cytochrome P450 CYP18A1 (Cyp18a1), mRNA	sp|Q95078|CP18A_DROME/8e-177/Cytochrome P450 18a1 OS=Drosophila melanogaster GN=Cyp18a1 PE=2 SV=2	tca:656794/0.0/Cyp18a1; cytochrome P450 CYP18A1; K14985 26-hydroxylase [EC:1.14.-.-]	BH0579/4e-25/---	PR00463/8.9E-57/E-class P450 group I signature	biological_process:GO:0055114//oxidation-reduction process;molecular_function:GO:0009055//electron carrier activity;GO:0020037//heme binding;GO:0070330//aromatase activity;GO:0005506//iron ion binding;
	Unigene37_All	1.10596	1.74e-19	3.65e-18	Up	gi|270006369|gb|EFA02817.1|/0/cytochrome P450 6BQ2 [Tribolium castaneum]	gi|157120793|ref|XM_001653624.1|/7e-10/Aedes aegypti cytochrome P450 partial mRNA	sp|Q9V773|C6A20_DROME/3e-108/Probable cytochrome P450 6a20 OS=Drosophila melanogaster GN=Cyp6a20 PE=2 SV=2	tca:664466/9e-172/CYP6BQ10, GLEAN_07320; cytochrome P450 6BQ10; K14999 cytochrome P450, family 6 [EC:1.14.-.-]	Cj1411c/1e-21/---	PF00067/3.0E-80/Cytochrome P450	NA
	Unigene10294_All	1.08429	1.56e-11	1.98e-10	Up	gi|270016183|gb|EFA12631.1|/0/cytochrome P450 6BK7 [Tribolium castaneum]	gi|194353943|ref|NM_001130403.1|/1e-14/Tribolium castaneum cytochrome P450 CYP6BK4 (Cyp6bk4), mRNA	sp|P13527|CP6A1_MUSDO/5e-117/Cytochrome P450 6A1 OS=Musca domestica GN=CYP6A1 PE=2 SV=1	tca:658760/0.0/CYP6BK7; cytochrome P450 6BK7; K14999 cytochrome P450, family 6 [EC:1.14.-.-]	Cj1411c/4e-33/---	PTHR24292:SF5/9.9E-239/--	NA
	CL1896.Contig7_All	-4.07635	8.55e-05	0.0004769	Down	gi|642925440|ref|XP_008194555.1|/8.34747e-47/PREDICTED: cytochrome P450 4C1-like [Tribolium castaneum]	NA	sp|P29981|CP4C1_BLADI/3e-13/Cytochrome P450 4C1 OS=Blaberus discoidalis GN=CYP4C1 PE=2 SV=1	tca:662193/1e-32/uncharacterized LOC662193; K15001 cytochrome P450, family 4 [EC:1.14.-.-]	NA	PTHR24305/2.6E-15/--	NA
	CL687.Contig3_All	-3.03633	1.97e-115	2.44e-113	Down	gi|270002749|gb|EEZ99196.1|/0/cytochrome P450 304E1 [Tribolium castaneum]	NA	sp|Q9VG17|CP304_DROME/1e-95/Probable cytochrome P450 304a1 OS=Drosophila melanogaster GN=Cyp304a1 PE=2 SV=2	tca:658858/2e-75/CYP15A1; cytochrome P450 15A1; K14937 methyl farnesoate epoxidase / farnesoate epoxidase [EC:1.14.13.202 1.14.13.203]	BH0579/2e-21/---	PR00463/1.564762E-35/E-class P450 group I signature	NA
	Unigene8881_All	-2.61617	7.79e-53	4.49e-51	Down	gi|270009285|gb|EFA05733.1|/0/cytochrome P450 6BT1 [Tribolium castaneum]	gi|242006241|ref|XM_002423917.1|/1e-05/Pediculus humanus corporis conserved hypothetical protein, mRNA	sp|Q27593|CP6A8_DROME/5e-100/Cytochrome P450 6a8 OS=Drosophila melanogaster GN=Cyp6a8 PE=2 SV=2	tca:658506/0.0/CYP6BT1; cytochrome P450 6BT1; K14999 cytochrome P450, family 6 [EC:1.14.-.-]	Cj1411c/4e-33/---	PTHR24292/2.1E-200/--	molecular_function:GO:0005488//binding;GO:0016491//oxidoreductase activity;
	CL2798.Contig2_All	-2.59234	1.63e-09	1.71e-08	Down	gi|270002917|gb|EEZ99364.1|/1.83554e-145/cytochrome P450-like protein [Tribolium castaneum]	NA	sp|Q9DBW0|CP4V2_MOUSE/1e-43/Cytochrome P450 4V2 OS=Mus musculus GN=Cyp4v2 PE=1 SV=1	umr:103681006/2e-44/cytochrome P450 4V2; K07427 cytochrome P450, family 4, subfamily V	AGc2890/9e-28/---	PR00385/7.1E-5/P450 superfamily signature	NA
	Unigene14363_All	-2.53694	1.12e-09	1.2e-08	Down	gi|642925882|ref|XP_008190661.1|/5.47396e-133/PREDICTED: probable cytochrome P450 6a17 [Tribolium castaneum]	gi|385199963|gb|JQ855667.1|/2e-08/Dendroctonus ponderosae clone DPO023_A01 cytochrome P450 CYP6CR2 (CYP6CR2) mRNA, complete cds	sp|Q9V771|C6A23_DROME/5e-81/Probable cytochrome P450 6a23 OS=Drosophila melanogaster GN=Cyp6a23 PE=2 SV=2	tca:658048/9e-134/probable cytochrome P450 6a17; K14999 cytochrome P450, family 6 [EC:1.14.-.-]	AGc2890/8e-29/---	PF00067/2.0E-83/Cytochrome P450	NA
	CL2288.Contig1_All	-1.92992	5.4e-108	6.27e-106	Down	gi|167466282|ref|NP_001107861.1|/0/cytochrome P450 monooxigenase CYP4Q1 [Tribolium castaneum] &gt;gi|270014306|gb|EFA10754.1| cytochrome P450-like protein [Tribolium castaneum]	gi|167466281|ref|NM_001114389.1|/4e-91/Tribolium castaneum cytochrome P450 monooxigenase CYP4Q1 (Cyp4q1), mRNA	sp|P29981|CP4C1_BLADI/3e-101/Cytochrome P450 4C1 OS=Blaberus discoidalis GN=CYP4C1 PE=2 SV=1	tca:659878/0.0/Cyp4q1; cytochrome P450 monooxigenase CYP4Q1; K15001 cytochrome P450, family 4 [EC:1.14.-.-]	AGc2890/4e-33/---	PTHR24290:SF0/1.1E-188/--	biological_process:GO:0055114//oxidation-reduction process;molecular_function:GO:0009055//electron carrier activity;GO:0016705//oxidoreductase activity, acting on paired donors, with incorporation or reduction of molecular oxygen;GO:0020037//heme binding;GO:0005506//iron ion binding;GO:0004497//monooxygenase activity;
	CL3355.Contig2_All	-1.92234	1.26e-33	4.49e-32	Down	gi|270012700|gb|EFA09148.1|/0/cytochrome P450 9AB1 [Tribolium castaneum]	gi|470011967|gb|KC686850.1|/6e-07/Tribolium castaneum strain LBS cytochrome P450 6BQ8 (CYP6BQ8) mRNA, complete cds	sp|Q964T2|CP9E2_BLAGE/8e-121/Cytochrome P450 9e2 OS=Blattella germanica GN=CYP9E2 PE=2 SV=1	tca:661282/0.0/CYP9AB1; cytochrome P450 9AB1; K15003 cytochrome P450, family 9 [EC:1.14.-.-]	Cj1411c/1e-27/---	PTHR24292/2.8E-176/--	molecular_function:GO:0046872//metal ion binding;GO:0016491//oxidoreductase activity;
	CL3355.Contig1_All	-1.82264	3.69e-30	1.2e-28	Down	gi|270012700|gb|EFA09148.1|/0/cytochrome P450 9AB1 [Tribolium castaneum]	NA	sp|Q964T2|CP9E2_BLAGE/5e-121/Cytochrome P450 9e2 OS=Blattella germanica GN=CYP9E2 PE=2 SV=1	tca:661282/0.0/CYP9AB1; cytochrome P450 9AB1; K15003 cytochrome P450, family 9 [EC:1.14.-.-]	AGc2890/2e-26/---	PS00086/-/Cytochrome P450 cysteine heme-iron ligand signature.	molecular_function:GO:0046872//metal ion binding;GO:0016491//oxidoreductase activity;
	CL3315.Contig1_All	-1.75402	2.21e-21	5.12e-20	Down	gi|642938930|ref|XP_008200093.1|/0/PREDICTED: LOW QUALITY PROTEIN: probable cytochrome P450 6a23 [Tribolium castaneum]	gi|197260155|gb|EU924172.1|/3e-98/Tribolium castaneum clone F16 cytochrome P450 mRNA, partial cds	sp|P33270|CP6A2_DROME/8e-114/Cytochrome P450 6a2 OS=Drosophila melanogaster GN=Cyp6a2 PE=2 SV=2	tca:658544/0.0/probable cytochrome P450 6a23; K14999 cytochrome P450, family 6 [EC:1.14.-.-]	AGc2890/1e-30/---	PTHR24292:SF5/6.9E-226/--	biological_process:GO:0055114//oxidation-reduction process;molecular_function:GO:0009055//electron carrier activity;GO:0016705//oxidoreductase activity, acting on paired donors, with incorporation or reduction of molecular oxygen;GO:0020037//heme binding;GO:0005506//iron ion binding;GO:0004497//monooxygenase activity;
	CL1581.Contig2_All	-1.67267	5.23e-102	5.76e-100	Down	gi|270016180|gb|EFA12628.1|/0/cytochrome P450 6BR2 [Tribolium castaneum]	NA	sp|Q9V771|C6A23_DROME/1e-113/Probable cytochrome P450 6a23 OS=Drosophila melanogaster GN=Cyp6a23 PE=2 SV=2	tca:658318/0.0/CYP6BR2; cytochrome P450 6BR2; K14999 cytochrome P450, family 6 [EC:1.14.-.-]	VNG0422G/2e-33/---	PF00067/1.7E-101/Cytochrome P450	NA
	CL1581.Contig1_All	-1.62242	2.18e-73	1.75e-71	Down	gi|270016180|gb|EFA12628.1|/0/cytochrome P450 6BR2 [Tribolium castaneum]	NA	sp|Q9V771|C6A23_DROME/5e-114/Probable cytochrome P450 6a23 OS=Drosophila melanogaster GN=Cyp6a23 PE=2 SV=2	tca:658318/0.0/CYP6BR2; cytochrome P450 6BR2; K14999 cytochrome P450, family 6 [EC:1.14.-.-]	VNG0422G/2e-33/---	PF00067/1.7E-101/Cytochrome P450	NA
	CL1896.Contig10_All	-1.56252	8.92e-07	6.84e-06	Down	gi|270009256|gb|EFA05704.1|/1.14024e-66/cytochrome P450-like protein [Tribolium castaneum]	NA	sp|Q9V3S0|CP4G1_DROME/2e-33/Cytochrome P450 4g1 OS=Drosophila melanogaster GN=Cyp4g1 PE=2 SV=1	tca:662193/1e-60/uncharacterized LOC662193; K15001 cytochrome P450, family 4 [EC:1.14.-.-]	AGc2890/2e-25/---	PS00086/-/Cytochrome P450 cysteine heme-iron ligand signature.	NA
	CL2288.Contig2_All	-1.49285	1.14e-50	6.24e-49	Down	gi|86515404|ref|NP_001034530.1|/1.32772e-176/cytochrome P450, family 4, subfamily Q, polypeptide 7 [Tribolium castaneum] &gt;gi|7862143|gb|AAF70496.1|AF254755_1 cytochrome P450 monooxigenase CYP4Q7 [Tribolium castaneum] &gt;gi|270014307|gb|EFA10755.1| cytochrome P450-like protein [Tribolium castaneum]	gi|167466281|ref|NM_001114389.1|/2e-50/Tribolium castaneum cytochrome P450 monooxigenase CYP4Q1 (Cyp4q1), mRNA	sp|P29981|CP4C1_BLADI/8e-96/Cytochrome P450 4C1 OS=Blaberus discoidalis GN=CYP4C1 PE=2 SV=1	tca:641610/2e-177/CYP4Q7; cytochrome P450 monooxigenase CYP4Q7 (EC:1.14.14.1); K15001 cytochrome P450, family 4 [EC:1.14.-.-]	VNG0422G/1e-28/---	PF00067/1.4E-82/Cytochrome P450	biological_process:GO:0055114//oxidation-reduction process;molecular_function:GO:0009055//electron carrier activity;GO:0016705//oxidoreductase activity, acting on paired donors, with incorporation or reduction of molecular oxygen;GO:0020037//heme binding;GO:0005506//iron ion binding;GO:0004497//monooxygenase activity;
	Unigene6623_All	-1.39651	4.7e-83	4.25e-81	Down	gi|270002740|gb|EEZ99187.1|/0/cytochrome P450 9AD1 [Tribolium castaneum]	NA	sp|Q964T2|CP9E2_BLAGE/8e-133/Cytochrome P450 9e2 OS=Blattella germanica GN=CYP9E2 PE=2 SV=1	tca:662432/0.0/CYP9AD1; cytochrome P450 9AD1; K15003 cytochrome P450, family 9 [EC:1.14.-.-]	Cj1411c/3e-30/---	PTHR24292/9.2E-184/--	molecular_function:GO:0005488//binding;GO:0016491//oxidoreductase activity;
	Unigene5635_All	-1.24873	2.11e-36	8.03e-35	Down	gi|270004417|gb|EFA00865.1|/0/hypothetical protein TcasGA2_TC003768 [Tribolium castaneum]	NA	sp|P29981|CP4C1_BLADI/3e-81/Cytochrome P450 4C1 OS=Blaberus discoidalis GN=CYP4C1 PE=2 SV=1	tca:657325/0.0/cytochrome P450 4C1-like; K15001 cytochrome P450, family 4 [EC:1.14.-.-]	BH0579/2e-39/---	PR00463/1.7E-22/E-class P450 group I signature	NA
	Unigene4438_All	-1.24511	1.55e-12	2.13e-11	Down	gi|270012700|gb|EFA09148.1|/1.0709e-178/cytochrome P450 9AB1 [Tribolium castaneum]	NA	sp|Q964T2|CP9E2_BLAGE/2e-104/Cytochrome P450 9e2 OS=Blattella germanica GN=CYP9E2 PE=2 SV=1	tca:661282/2e-179/CYP9AB1; cytochrome P450 9AB1; K15003 cytochrome P450, family 9 [EC:1.14.-.-]	BH0579/2e-26/---	PF00067/1.1E-83/Cytochrome P450	molecular_function:GO:0005488//binding;GO:0016491//oxidoreductase activity;
	CL2456.Contig4_All	-1.17792	2.83e-31	9.46e-30	Down	gi|270006371|gb|EFA02819.1|/0/cytochrome P450 6BQ5 [Tribolium castaneum]	gi|470011984|gb|KC686855.1|/7e-13/Tribolium castaneum strain LBS cytochrome P450 6BQ10 (CYP6BQ10) mRNA, complete cds	sp|Q9V4U7|C6A14_DROME/9e-109/Probable cytochrome P450 6a14 OS=Drosophila melanogaster GN=Cyp6a14 PE=3 SV=2	tca:664475/0.0/CYP6BQ5; probable cytochrome P450 6a14; K14999 cytochrome P450, family 6 [EC:1.14.-.-]	BH0579/8e-26/---	PR00464/3.0E-9/Group II E-class P450 signature	biological_process:GO:0055114//oxidation-reduction process;molecular_function:GO:0009055//electron carrier activity;GO:0016705//oxidoreductase activity, acting on paired donors, with incorporation or reduction of molecular oxygen;GO:0020037//heme binding;GO:0005506//iron ion binding;GO:0004497//monooxygenase activity;
	Unigene2196_All	-1.15044	1.05e-15	1.76e-14	Down	gi|152211731|gb|ABS31131.1|/0/cytochrome P450 [Tribolium castaneum]	gi|152211730|gb|EU008544.1|/0.0/Tribolium castaneum clone F13 cytochrome P450 mRNA, complete cds	sp|Q964R0|CP6K1_BLAGE/2e-102/Cytochrome P450 6k1 OS=Blattella germanica GN=CYP6K1 PE=2 SV=1	tca:660152/0.0/CYP345D1; cytochrome P450 345D1; K14999 cytochrome P450, family 6 [EC:1.14.-.-]	SMc02579/9e-29/---	PR00463/1.16E-19/E-class P450 group I signature	NA
	Unigene11018_All	-1.07653	8.12e-34	2.92e-32	Down	gi|270016181|gb|EFA12629.1|/0/cytochrome P450 6BR1 [Tribolium castaneum]	gi|194353943|ref|NM_001130403.1|/6e-13/Tribolium castaneum cytochrome P450 CYP6BK4 (Cyp6bk4), mRNA	sp|P33270|CP6A2_DROME/1e-107/Cytochrome P450 6a2 OS=Drosophila melanogaster GN=Cyp6a2 PE=2 SV=2	tca:658388/0.0/CYP6BR1; cytochrome P450 6BR1; K14999 cytochrome P450, family 6 [EC:1.14.-.-]	BH0579/7e-32/---	PR00385/2.9E-9/P450 superfamily signature	NA
	CL1896.Contig2_All	-1.06452	5.97e-23	1.48e-21	Down	gi|270009256|gb|EFA05704.1|/0/cytochrome P450-like protein [Tribolium castaneum]	NA	sp|P29981|CP4C1_BLADI/5e-68/Cytochrome P450 4C1 OS=Blaberus discoidalis GN=CYP4C1 PE=2 SV=1	tca:662193/7e-165/uncharacterized LOC662193; K15001 cytochrome P450, family 4 [EC:1.14.-.-]	AGc2890/4e-31/---	PR00385/1.3E-6/P450 superfamily signature	NA
	CL426.Contig5_All	6.88264	0.00011112	0.000607647	Up	gi|642921833|ref|XP_008199339.1|/2.27373e-39/PREDICTED: uncharacterized protein LOC659608 isoform X2 [Tribolium castaneum]	NA	NA	tca:659608/4e-40/uncharacterized LOC659608; K15005 cytochrome P450, family 28 [EC:1.14.-.-]	NA	NA	NA
CarE	CL470.Contig9_All	2.5979	1.13e-06	8.5e-06	Up	gi|189237975|ref|XP_001812133.1|/3.49576e-145/PREDICTED: uncharacterized protein LOC100141857 [Tribolium castaneum]	gi|189237974|ref|XM_001812081.1|/1e-116/PREDICTED: Tribolium castaneum uncharacterized LOC100141857 (LOC100141857), mRNA	sp|B2D0J5|EST6_APIME/5e-08/Venom carboxylesterase-6 OS=Apis mellifera PE=2 SV=1	dme:Dmel_CG6917/1e-06/Est-6; Esterase 6 (EC:3.1.1.- 3.1.1.1); K01044 carboxylesterase 1 [EC:3.1.1.1]	NA	PTHR20905/1.5E-26/--	molecular_function:GO:0016787//hydrolase activity;
	Unigene9052_All	-2.54057	1.77e-15	2.91e-14	Down	gi|91091808|ref|XP_970896.1|/5.73313e-152/PREDICTED: venom carboxylesterase-6 [Tribolium castaneum] &gt;gi|270001099|gb|EEZ97546.1| hypothetical protein TcasGA2_TC011396 [Tribolium castaneum]	NA	sp|B2D0J5|EST6_APIME/8e-92/Venom carboxylesterase-6 OS=Apis mellifera PE=2 SV=1	tca:658208/9e-71/Tcjhe; juvenile hormone esterase; K01063 juvenile-hormone esterase [EC:3.1.1.59]	BS_pnbA/3e-39/---	PF00135/2.9E-135/Carboxylesterase family	NA
	CL2727.Contig3_All	-2.05961	1.1e-38	4.47e-37	Down	gi|642936588|ref|XP_008198496.1|/0/PREDICTED: carboxylesterase 1E-like [Tribolium castaneum] &gt;gi|270014148|gb|EFA10596.1| hypothetical protein TcasGA2_TC012856 [Tribolium castaneum]	NA	sp|Q64176|EST1E_MOUSE/5e-60/Carboxylesterase 1E OS=Mus musculus GN=Ces1e PE=1 SV=1	tca:657513/2e-86/cholinesterase 1-like; K03927 carboxylesterase 2 [EC:3.1.1.1 3.1.1.84 3.1.1.56]	CAP0050/1e-42/---	PTHR11559/2.1E-154/--	NA
	CL1916.Contig1_All	-2.04327	4.27e-39	1.78e-37	Down	gi|642915814|ref|XP_968881.2|/0/PREDICTED: venom carboxylesterase-6-like [Tribolium castaneum] &gt;gi|270004063|gb|EFA00511.1| hypothetical protein TcasGA2_TC003375 [Tribolium castaneum]	NA	sp|B2D0J5|EST6_APIME/9e-63/Venom carboxylesterase-6 OS=Apis mellifera PE=2 SV=1	tca:661445/6e-155/esterase B1-like; K01050 cholinesterase [EC:3.1.1.8]	BS_pnbA/7e-52/---	PF00135/4.8E-126/Carboxylesterase family	molecular_function:GO:0016787//hydrolase activity;
	Unigene3918_All	-1.83188	9.72e-06	6.38e-05	Down	gi|642936588|ref|XP_008198496.1|/1.86963e-37/PREDICTED: carboxylesterase 1E-like [Tribolium castaneum] &gt;gi|270014148|gb|EFA10596.1| hypothetical protein TcasGA2_TC012856 [Tribolium castaneum]	NA	NA	tca:657513/2e-12/cholinesterase 1-like; K03927 carboxylesterase 2 [EC:3.1.1.1 3.1.1.84 3.1.1.56]	NA	PF00135/3.8E-10/Carboxylesterase family	molecular_function:GO:0016787//hydrolase activity;
	CL470.Contig3_All	-1.7458	5.75e-85	5.37e-83	Down	gi|91084115|ref|XP_967137.1|/0/PREDICTED: venom carboxylesterase-6 [Tribolium castaneum] &gt;gi|270008042|gb|EFA04490.1| hypothetical protein TcasGA2_TC014795 [Tribolium castaneum]	gi|189237974|ref|XM_001812081.1|/6e-73/PREDICTED: Tribolium castaneum uncharacterized LOC100141857 (LOC100141857), mRNA	sp|B2D0J5|EST6_APIME/5e-89/Venom carboxylesterase-6 OS=Apis mellifera PE=2 SV=1	api:100163376/5e-96/esterase E4-like; K03927 carboxylesterase 2 [EC:3.1.1.1 3.1.1.84 3.1.1.56]	BS_pnbA/6e-50/---	PS00941/-/Carboxylesterases type-B signature 2.	molecular_function:GO:0016787//hydrolase activity;
	Unigene2217_All	-1.53361	1.12e-34	4.13e-33	Down	gi|91093627|ref|XP_972251.1|/0/PREDICTED: venom carboxylesterase-6 [Tribolium castaneum] &gt;gi|270015768|gb|EFA12216.1| hypothetical protein TcasGA2_TC005133 [Tribolium castaneum]	NA	sp|B2D0J5|EST6_APIME/8e-64/Venom carboxylesterase-6 OS=Apis mellifera PE=2 SV=1	tca:661445/1e-145/esterase B1-like; K01050 cholinesterase [EC:3.1.1.8]	BS_pnbA/1e-51/---	PF00135/7.9E-122/Carboxylesterase family	molecular_function:GO:0016787//hydrolase activity;
	CL1916.Contig3_All	-1.52639	2.03e-15	3.33e-14	Down	gi|642915814|ref|XP_968881.2|/2.86155e-174/PREDICTED: venom carboxylesterase-6-like [Tribolium castaneum] &gt;gi|270004063|gb|EFA00511.1| hypothetical protein TcasGA2_TC003375 [Tribolium castaneum]	NA	sp|P38433|ACE1_CAEEL/1e-20/Acetylcholinesterase 1 OS=Caenorhabditis elegans GN=ace-1 PE=1 SV=1	tca:661445/2e-91/esterase B1-like; K01050 cholinesterase [EC:3.1.1.8]	BS_pnbA/4e-19/---	PF00135/2.7E-55/Carboxylesterase family	molecular_function:GO:0016787//hydrolase activity;
	CL1600.Contig2_All	-1.52497	8.82e-47	4.36e-45	Down	gi|642937320|ref|XP_008198786.1|/0/PREDICTED: venom carboxylesterase-6-like [Tribolium castaneum]	NA	sp|B2D0J5|EST6_APIME/2e-106/Venom carboxylesterase-6 OS=Apis mellifera PE=2 SV=1	tca:658208/3e-76/Tcjhe; juvenile hormone esterase; K01063 juvenile-hormone esterase [EC:3.1.1.59]	BS_pnbA/5e-38/---	PF00135/7.7E-137/Carboxylesterase family	molecular_function:GO:0016787//hydrolase activity;
	CL358.Contig2_All	-1.30832	1.44e-12	1.98e-11	Down	gi|91091808|ref|XP_970896.1|/3.49413e-178/PREDICTED: venom carboxylesterase-6 [Tribolium castaneum] &gt;gi|270001099|gb|EEZ97546.1| hypothetical protein TcasGA2_TC011396 [Tribolium castaneum]	NA	sp|B2D0J5|EST6_APIME/3e-95/Venom carboxylesterase-6 OS=Apis mellifera PE=2 SV=1	tca:658208/3e-69/Tcjhe; juvenile hormone esterase; K01063 juvenile-hormone esterase [EC:3.1.1.59]	BS_pnbA/8e-37/---	PTHR11559/2.5E-153/--	NA
	Unigene1035_All	-1.06926	2.33e-39	9.79e-38	Down	gi|642937255|ref|XP_968653.3|/0/PREDICTED: venom carboxylesterase-6-like [Tribolium castaneum] &gt;gi|270001082|gb|EEZ97529.1| hypothetical protein TcasGA2_TC011376 [Tribolium castaneum]	NA	sp|B2D0J5|EST6_APIME/3e-104/Venom carboxylesterase-6 OS=Apis mellifera PE=2 SV=1	tca:658208/6e-71/Tcjhe; juvenile hormone esterase; K01063 juvenile-hormone esterase [EC:3.1.1.59]	BS_pnbA/5e-46/---	PTHR11559/8.0E-145/--	molecular_function:GO:0016787//hydrolase activity;
